# Neural circuit basis of aversive odour processing in *Drosophila* from sensory input to descending output.

Paavo Huoviala,<sup>1,2</sup> Michael-John Dolan,<sup>1,3,†</sup> Fiona M. Love,<sup>2,†</sup> Philip Myers,<sup>1</sup> Shahar Frechter,<sup>1</sup>, Shigehiro Namiki,<sup>3</sup> Lovisa Pettersson,<sup>4</sup> Ruairí J.V. Roberts,<sup>2</sup> Robert Turnbull,<sup>2</sup> Zane Mitrevica,<sup>2</sup>, Patrick Breads,<sup>3</sup> Philipp Schlegel,<sup>2</sup> Alexander Shakeel Bates,<sup>1</sup> Tiago Rodrigues,<sup>1</sup> Yoshinori Aso,<sup>3</sup> David Bock,<sup>3</sup> Gerald M. Rubin,<sup>3</sup> Marcus Stensmyr,<sup>4</sup> Gwyneth Card,<sup>3</sup> Marta Costa,<sup>2</sup> Gregory S.X.E. Jefferis,<sup>1,2,\*</sup>

<sup>1</sup> MRC Laboratory of Molecular Biology, Cambridge, CB2 0QH, UK

<sup>2</sup> *Drosophila* Connectomics Group, Department of Zoology, University of Cambridge, Downing Street, Cambridge, CB2 3EJ UK

<sup>3</sup> Janelia Research Campus, Howard Hughes Medical Institute, USA

<sup>4</sup> Department of Biology, Lund University, 22100 Lund, Sweden

<sup>†</sup> These authors contributed equally to this work

\* Corresponding author: jefferis@mrc-lmb.cam.ac.uk

**Abstract** Evolution has shaped nervous systems to produce stereotyped behavioural responses to ethologically relevant stimuli. For example when laying eggs, female *Drosophila* avoid geosmin, an odorant produced by toxic moulds. Here we identify second, third, and fourth order neurons required for this innate olfactory aversion. Connectomics data place these neurons in a complete synaptic circuit from sensory input to descending output. We find multiple levels of valence-specific convergence, including a novel form of axo-axonic input onto second order neurons conveying another danger signal, the pheromone of parasitoid wasps. However, we also observe extensive divergence: second order geosmin neurons connect with a diverse array of 80 third order cell types. We find a pattern of convergence of aversive odour channels at this level. Crossing one more synaptic layer, we identified descending neurons critical for egg-laying aversion. Our data suggest a transition from a labelled line organisation in the periphery to a highly distributed central brain representation that is then coupled to distinct descending pathways.

1 Microbes and parasites are a major driving force of natural selection in animals. As immunological defence is costly and reactive, it is better to avoid sources of infection whenever possible (1). *Drosophila* avoid laying eggs on food contaminated with harmful moulds. This avoidance is triggered by a volatile molecule, geosmin, sensed through a single olfactory receptor (Or56a) expressed in only ~ 25 sensory neurons (ORNs) per antenna (2, 3). The olfactory system, in both vertebrates and invertebrates, is a particularly shallow sensory modality where the sensory periphery is only two synapses away from higher brain areas important for organizing behaviour and forming memories (4). The clear behavioural significance of geosmin, together with Or56a ORNs being its sole dedicated sensor, make this 'labelled line' pathway an attractive target for studies of how sensory signals are transformed into innate, ethologically appropriate behavioural responses. Since the challenge of differentiating suitable from contaminated food substrates is ubiquitous and encompasses many issues in sensory processing, general principles are likely to emerge from these studies.

21 Building on the identification of Or56a sensory neurons  
22 (2), we traced the geosmin pathway deeper into the brain.  
23 Wild-type flies avoid geosmin in an egg-laying two-choice  
24 assay, and this avoidance is solely due to olfaction via the  
25 Or56a ORNs (2) (Figure S1, A and B). However, geosmin  
26 did not decrease egg-laying quantity in a no-choice situation  
27 (Figure S1C), suggesting that the phenotype arises from  
28 positional aversion. Or56a ORNs synapse onto uniglomerular  
29 DA2 projection neurons (PNs) in the antennal lobe. We  
30 identified a sparse driver line (R85E04-GAL4, Figure 1A (5))  
31 that potentially labelled DA2 PNs. Driving the Halo-tag reporter  
32 (6) with Or56a-GAL4 and R85E04 verified that both sets  
33 of neurons target the same glomerulus (Figure S1D)  
34 while immunostaining confirmed that the PNs are cholinergic  
35 and excitatory (Figure S1F). *In vivo* electrophysiology revealed  
36 strong and highly selective responses to geosmin (Figure  
37 S1E). 'Labelled-line' encoding of geosmin is therefore retained  
38 at the second order PN level.

39 To demonstrate the functional role of these DA2 PNs, we  
40 silenced their synaptic output by expressing tetanus toxin  
41 (7) via R85E04. This completely abolished avoidance behaviour  
42 (Figure 1B) confirming that DA2 PNs are necessary for geosmin  
43 sensing. In summary, R85E04 labels the excitatory DA2 PNs  
44 postsynaptic to Or56a ORNs; these PNs respond strongly and  
45 selectively to geosmin, and are necessary for geosmin avoidance  
46 behaviour during egg-laying, a task of key ethological importance  
47 to the animal.

48 DA2 PNs project to two higher brain areas: the mushroom  
49 body (MB) and the lateral horn (LH). The former is thought  
50 to be involved in associative learning and the latter in innate  
51 behaviour. As expected, the MB appeared not to play a role in  
52 geosmin aversion (Figure 1B), so we focused on the LH.  
53 The axonal morphology of DA2 PNs shows notable similarities  
54 with several other aversive odour processing PNs (Figure  
55 1C), particularly in the ventral-posterior LH (dashed line  
56 in Figure 1C), an area recently suggested to be important for  
57 egg-laying aversion (8). The similarity is especially striking  
58 with DL4 PNs, which are postsynaptic to Or49a/Or85f ORNs  
59 tuned to the sex pheromone of the parasitic wasp *L. boulandi*  
60 (9). This suggests the possibility of valence-based integration

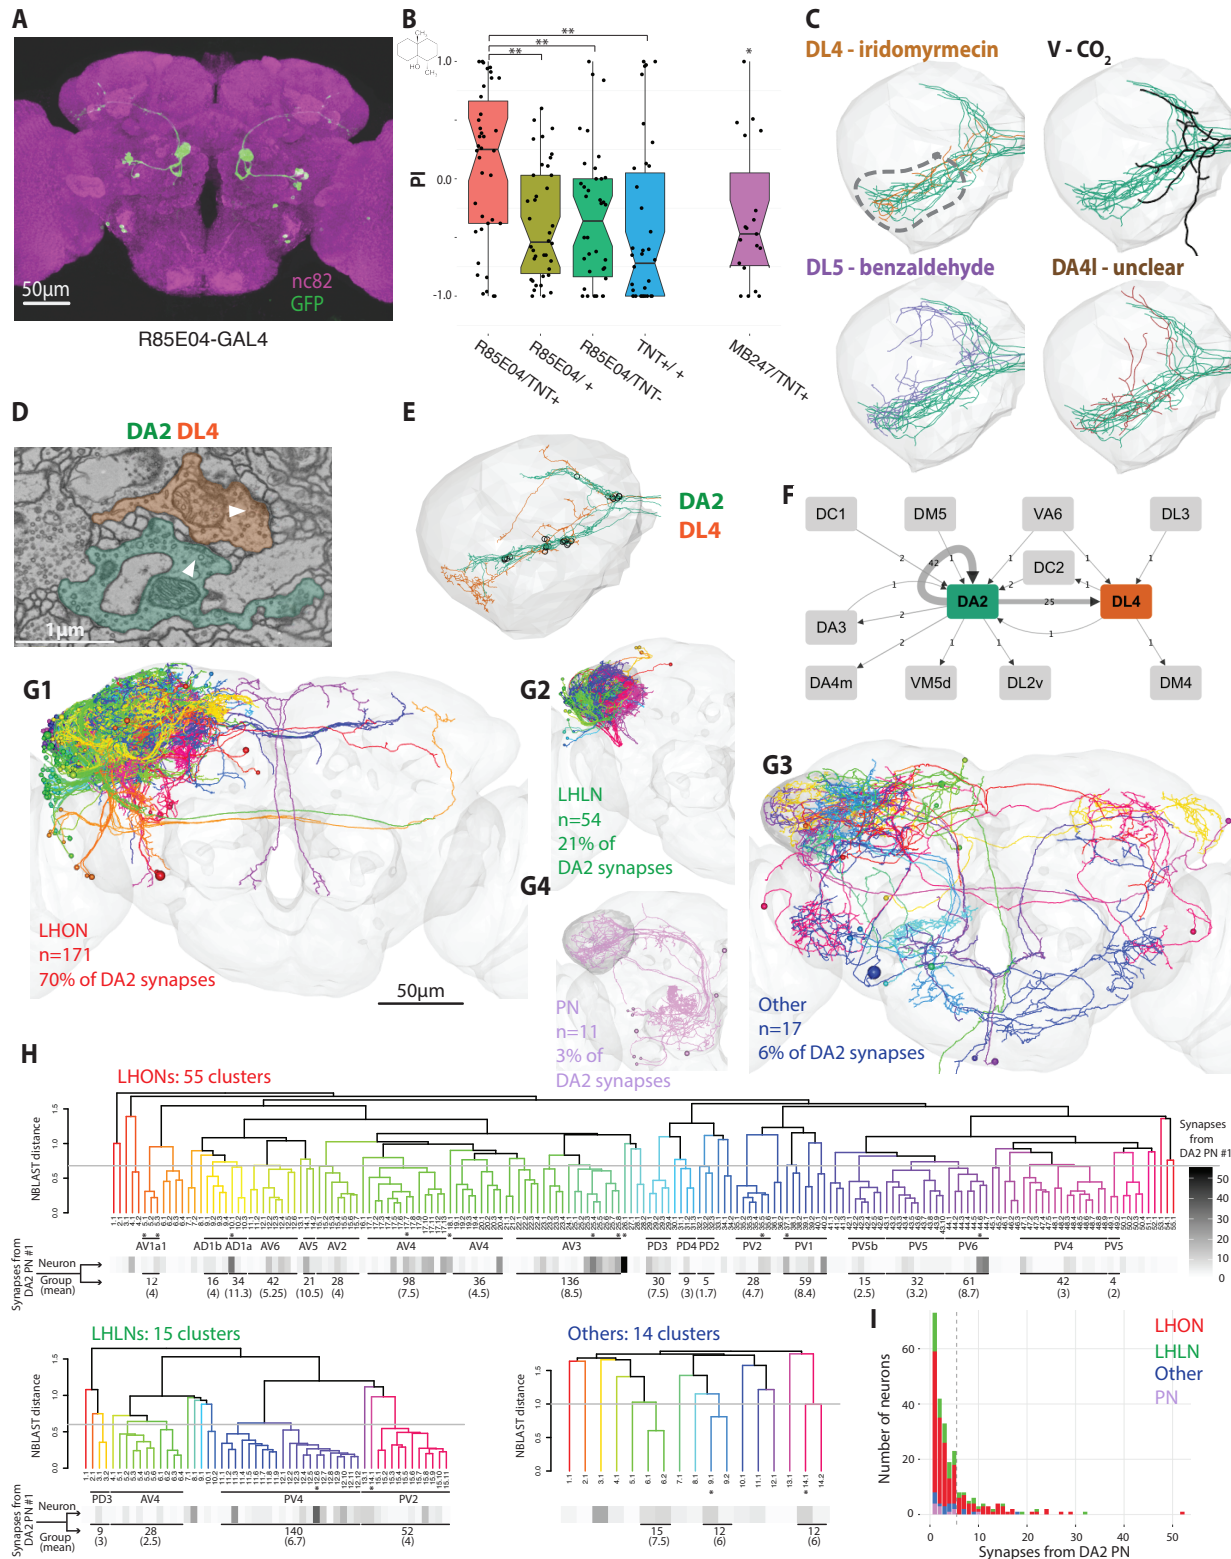

**Figure 1:** DA2 PNs are necessary for geosmin avoidance, synapse axo-axonically onto the aversive DL4 PNs, and then onto a large number of morphologically diverse third-order neurons. (A) R85E04 labels 5-6 DA2 uniglomerular PNs per hemisphere. (B) Egg-laying two-choice preference indices (PI) to geosmin while silencing DA2 PNs ( $n=38$  for R85E04 and its controls,  $n=19$  for MB247-GAL4/TNT+). (C) Frontal view of DA2 PN axons (green) with examples of other aversive PNs in the LH (DL4, V, DL5). DA4I targets the same area of the LH, but its ligand and valence are unclear. The dashed line marks the putative zone of aversive convergence. (D) An example of a DA2 PN (green) to DL4 PN (orange) axo-axonic synapse in the LH. The arrowheads mark the presynaptic sites. (E) Location of axo-axonic synapses from DA2 to DL4 PNs (open circles). (F) Axo-axonic PN synapses from and to DA2 PNs ( $n=5$ ) in the right hemisphere. (G1-G4) Downstream targets of DA2 PNs in the LH, by broad neuron class (LHONs, LHLNs, unclassified neurons and PNs). (H) Hierarchical clustering of the DA2 PN downstream target morphologies. Grey lines mark the cut off heights (LHON:0.68, LHLN:0.60, Others:1.0), greyscale bar under the dendrograms the number of synapses from the completed DA2 PN, and asterisks the completed neurons. (I) Distribution of the synaptic connections from the DA2 PN to its downstream targets, color-coded by broad neuron class. Grey line marks the shoulder of the distribution, between 5 and 6 synapses. Significance values: \*  $p<0.05$  \*\*  $p<0.01$

61 by downstream neurons in the LH (9, 10).

62 To look for downstream targets of DA2 PNs, and thus possi- 122  
63 ble valence integrator neurons, we took two parallel, comple- 123  
64 mentary approaches. First, we reconstructed DA2 PNs and 124  
65 their postsynaptic partners in the LH in a recently acquired 125  
66 whole-brain electron microscopy (EM) volume of a female 126  
67 *Drosophila* (11), which we refer to as FAFB. We were then able 127  
68 to make comparisons with a second recently acquired partial 128  
69 EM volume of a female (referred to as hemibrain) (12). 129

70 Second, we performed a light-level *in silico* anatomical 130  
71 screen to look for genetic driver lines containing LH neurons 131  
72 (LHNs) putatively downstream of DA2 PNs. We will discuss 132  
73 the EM connectomics approach first. 133

74 Previous work had already identified all the uniglomerular 134  
75 PNs on the right (R) side of the EM volume (11), includ- 135  
76 ing 5 DA2 PNs. We additionally identified 6 DA2 PNs on the 136  
77 left (L) side of the brain, and marked up all their presynaptic 137  
78 sites on both sides (R: 961, L: 959). Surprisingly, we found a 138  
79 relatively large number (R: 25; L: 32) of axo-axonic synapses 139  
80 from the DA2 PNs to the single aversive DL4 PN (Figure 1D, 140  
81 E and F, Figure S2A and B), mostly clustered on the ven- 141  
82 tral axonal branches (Figure 1E). These axo-axonic synapses 142  
83 are also present in the hemibrain (R: 31) Figure S1G). In 143  
84 FAFB no other PN receives more than 2 synapses from the 144  
85 DA2 PNs (Figure 1F), while in the hemibrain, only one other 145  
86 PN receives more than 4 synapses (DA4m) Figure S1G). In 146  
87 both volumes DA2 PNs also synapse strongly onto each 147  
88 other (Figure 1F, Figure S2B), and Figure S1G), thus showing 148  
89 within-odour channel divergence and re-convergence that 149  
90 may serve to increase signal detection speed (13). As a large 150  
91 number of PNs pass close to DA2 synapses without receiv- 151  
92 ing input (Figure S2C), this connectivity appears specific, not 152  
93 just proximity based. This is also supported by the absence of 153  
94 connections from DL4 PNs to DA2 PNs. Axo-axonic integra- 154  
95 tion of PN odour channels has not been previously described, 155  
96 although our recent work (14) has found that it is widespread 156  
97 within PN axons. This type of connectivity may be an im- 157  
98 portant mechanism for valence-based integration, ultimately 158  
99 triggering similar behavioural responses to odours of similar 159  
100 significance to the fly. 160

101 We next obtained a complete downstream connectome of 161  
102 the LH targets for a single DA2 PN (Figure S2D). We recon- 162  
103 structed the postsynaptic partners sufficiently to enable un- 163  
104 ambiguous identification, and quantification of the DA2 PN 164  
105 input. This identified a surprisingly large array of 253 neu- 165  
106 rons: 171 LH output neurons (LHONs) (Figure 1G1), 54 LH 166  
107 local neurons (Figure 1G2), 11 PNs (Figure 1G4) and 17 other 167  
108 neurons (Figure 1G3). These last 17 include large brain span- 168  
109 ning neurons; 10 appear neuromodulatory due to the pres- 169  
110 ence of dense core vesicles or because they are labelled by 170  
111 the TH-GAL4 driver in the FlyCircuit database (15, 16). 171

112 Together, the 225 LHN target neurons make up ~ 18% 172  
113 of the estimated total of ~ 1400 neurons in the LH (17), a 173  
114 very large fraction given that DA2 is just one of 51 olfacto- 174  
115 ry glomeruli (2%). The majority (~ 70%) of DA2 synapses 175  
116 were onto LHONs, and ~ 21% onto LHLNs, roughly matching 176  
117 the proportion of neurons in each broad class. The LHONs 177  
118 project to various neuropils thought to be involved in mul- 178  
119 timodal sensory integration (Figure S2E) (18–23). The neu- 179  
120 rons are of diverse morphologies: hierarchical clustering of 180  
121 each broad class, splits them into 84 clusters (55 LHONs,

15 LHLNs, 14 others), excluding PNs (Figure 1H). Taken to- 122  
together this suggests the wiring logic of the LH is massively 123  
more complex than previously thought (21, 24): PNs from 124  
a ‘labelled line’ glomerulus with clear behavioural meaning 125  
do not synapse onto just a few postsynaptic targets. How- 126  
ever, the distribution of connectivity is skewed; the majority 127  
of targets receive only a few inputs (Figure 1I), and for all 5 128  
RH DA2 PNs in both EM volumes ~ 25% of all DA2 down- 129  
stream neurons make up more than 50% of all synaptic out- 130  
put (Figure S2D). Moreover, LHONs in the same morphologi- 131  
cal clusters have a higher than chance probability of getting 132  
similar levels of DA2 input (Figure S2E, see Methods), but the 133  
same is not true for LHLNs (and was not tested for the other 134  
neurons, which are more structurally diverse). In summary, 135  
the geosmin processing pathway that starts as a labelled line 136  
shows convergence at the level of PN axons with another 137  
aversive pathway (DL4 PNs), as well as considerable diver- 138  
gence at the transition from second to third-order level. 139

140 In order to answer whether valence-based integration 140  
takes place in the LH we selected a sample of 15 DA2 strong 141  
downstream neurons of diverse morphologies for complete 142  
reconstruction in FAFB. As all the uniglomerular excitatory 143  
PNs on the right hemisphere were completed we could identi- 144  
fy every PN input onto these neurons. Figure 2A shows the 145  
morphologies of the completed neurons (cell typing accord- 146  
ing to (14)). We observe a range of input tuning profiles, from 147  
DA2 specific (AVLP594, a neuropeptidergic brain-spanning 148  
neuron, Figure S2G and H (25)) to completely or nearly aver- 149  
sive odour specific (LHPV6a3#1, LHAV3a1\_c#1), to relatively 150  
broadly tuned (LHAV3f1, LHAV1a1) (Figure 2B). Altogether, 151  
9/15 neurons receive above chance amounts of aversive in- 152  
put from PNs besides DA2. We then identified the same cell 153  
types in the hemibrain for comparison. Averaging within cell 154  
types and normalising inputs shows few major differences 155  
in connectivity for our DA2 downstream targets (Figure 2B). 156  
Similar to FAFB, 8/15 neurons in the hemibrain receive above 157  
chance amounts of aversive input from non-DA2 PNs. 158

159 In addition, most of these neurons receive input from 159  
thermo- and hygrosensory VP glomeruli (Figure 2B) (26). 160  
This may reflect either direct multisensory integration of 161  
aversive signals for extremes of temperature or humidity 162  
(critical dangers for insects), or cross-sensory modulation of 163  
olfactory pathways by environmental context. These patterns 164  
of synaptic connectivity therefore support valence-based in- 165  
tegration occurring in the LH. However this is unlikely to be 166  
the only computation taking place at this transition from sec- 167  
ond to third-order level of the circuit. 168

169 In parallel with our EM work, we carried out a light-level 169  
screen for DA2 downstream neurons and driver lines. We 170  
used a registered confocal stack of R85E04 and converted 171  
the LH axon arbour into a binary mask (Figure 3A). This 172  
allowed us to identify sparse driver lines from the GMR-GAL4 173  
(5) and LH-Split collections (36) containing LHNs with den- 174  
drites overlapping the DA2 axons (Figure 3B and C). This *in* 175  
*silico* anatomical screen identified 18 LHN types, 12 of which 176  
could be accessed relatively specifically through either GAL4 177  
or Split-GAL4 lines. 178

179 With these reagents in hand, we carried out an optoge- 179  
netic activation screen hoping to identify aversion triggering 180  
LHNs. A total of 27 driver lines (for 12 LHN types) were tested 181  
using a four-field arena (Figure 3D, see (36) for full details of 182

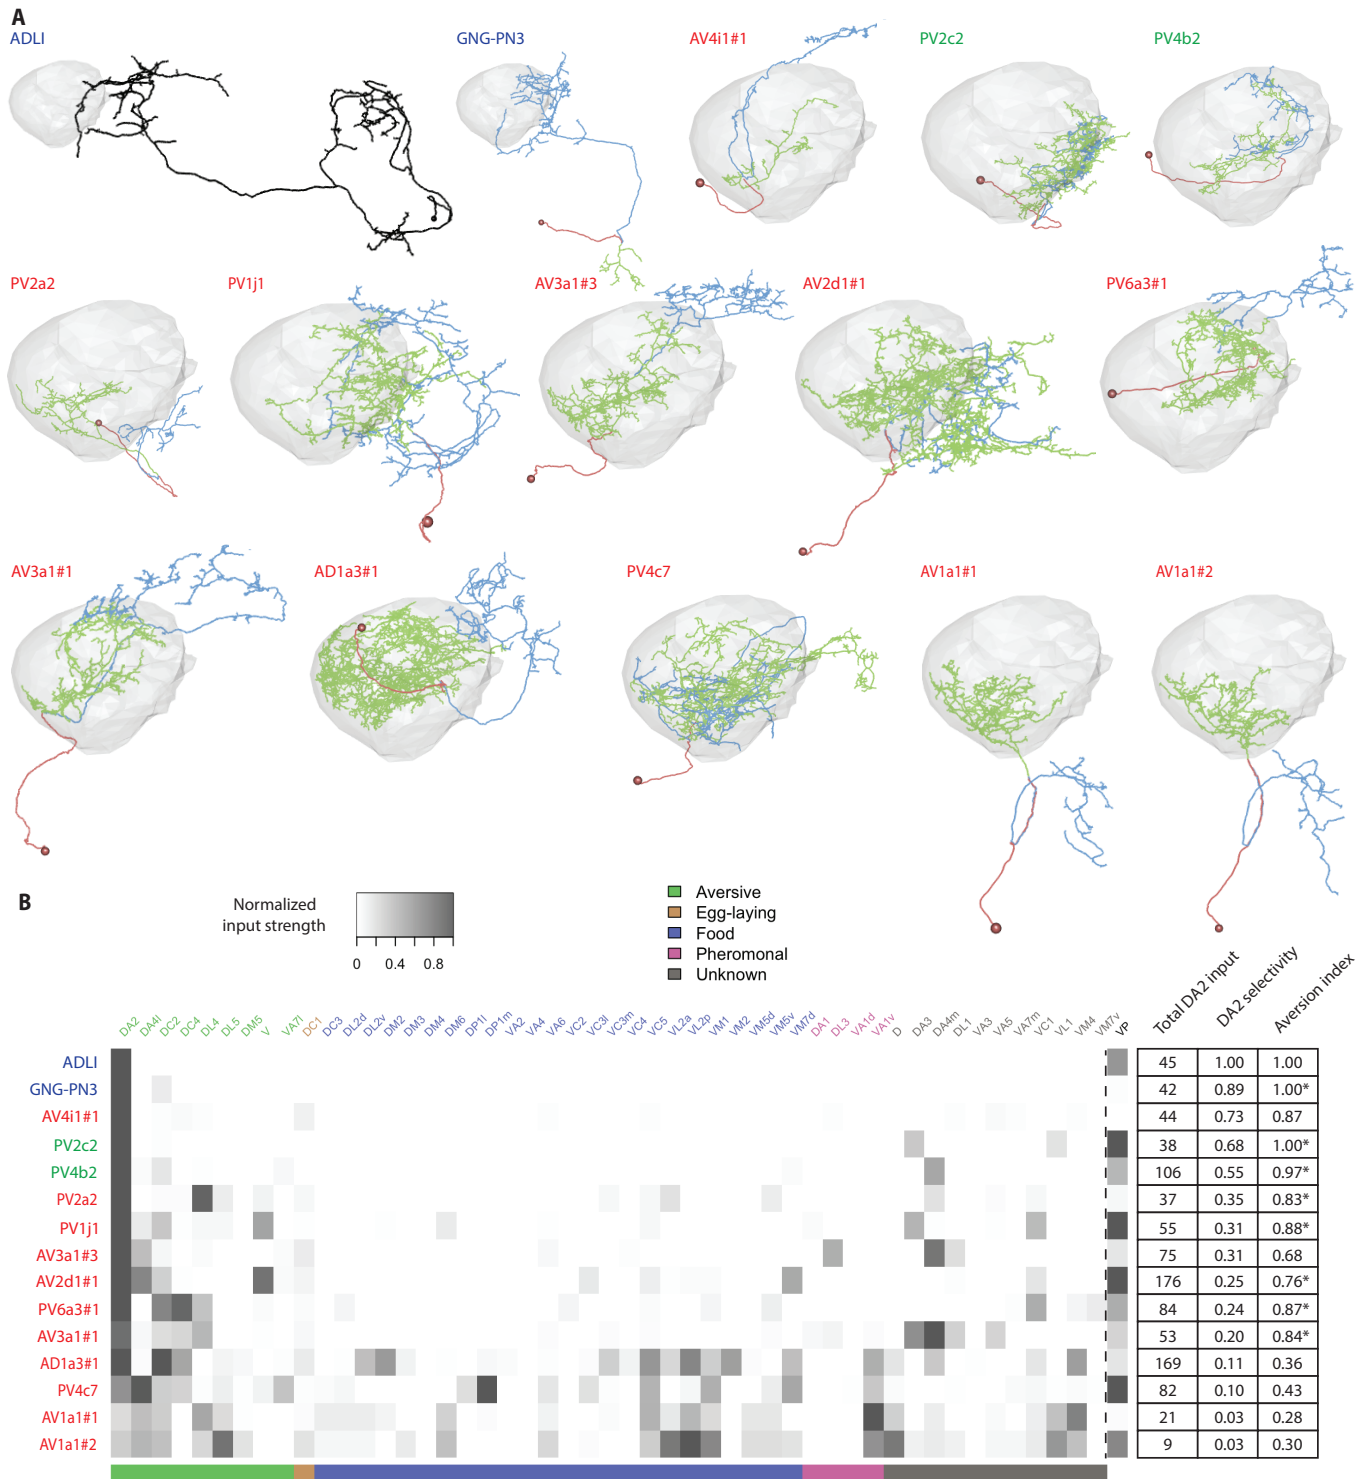

**Figure 2:** Strong DA2 downstream targets have diverse tuning breadths but tend to receive more than a chance amount of non-DA2 aversive PN input. (A) EM-reconstructed morphologies of selected strong DA2 targets. Cell bodies and primary neurites are coloured in red, dendrites in green, and axons in blue, where polarity is clear. Neuron names are color-coded by broad neuron class (other: dark blue, LHON: red, LHLN: green). (B) A heatmap representation of excitatory uPN to LHN connectivity for top DA2 targets in both EM volumes, FAFB and the hemibrain, normalised by the total uPN inputs to each neuron, with glomeruli color-coded by putative behavioural relevance ((2, 9, 27–35)). The total amount of DA2 input, DA2 selectivity (DA2 input/total uPN input), and Aversion index (DA2 input/uPN input from PN channels with known valence). Neurons receiving more than chance amount of non-DA2 aversive input are marked with an asterisk.

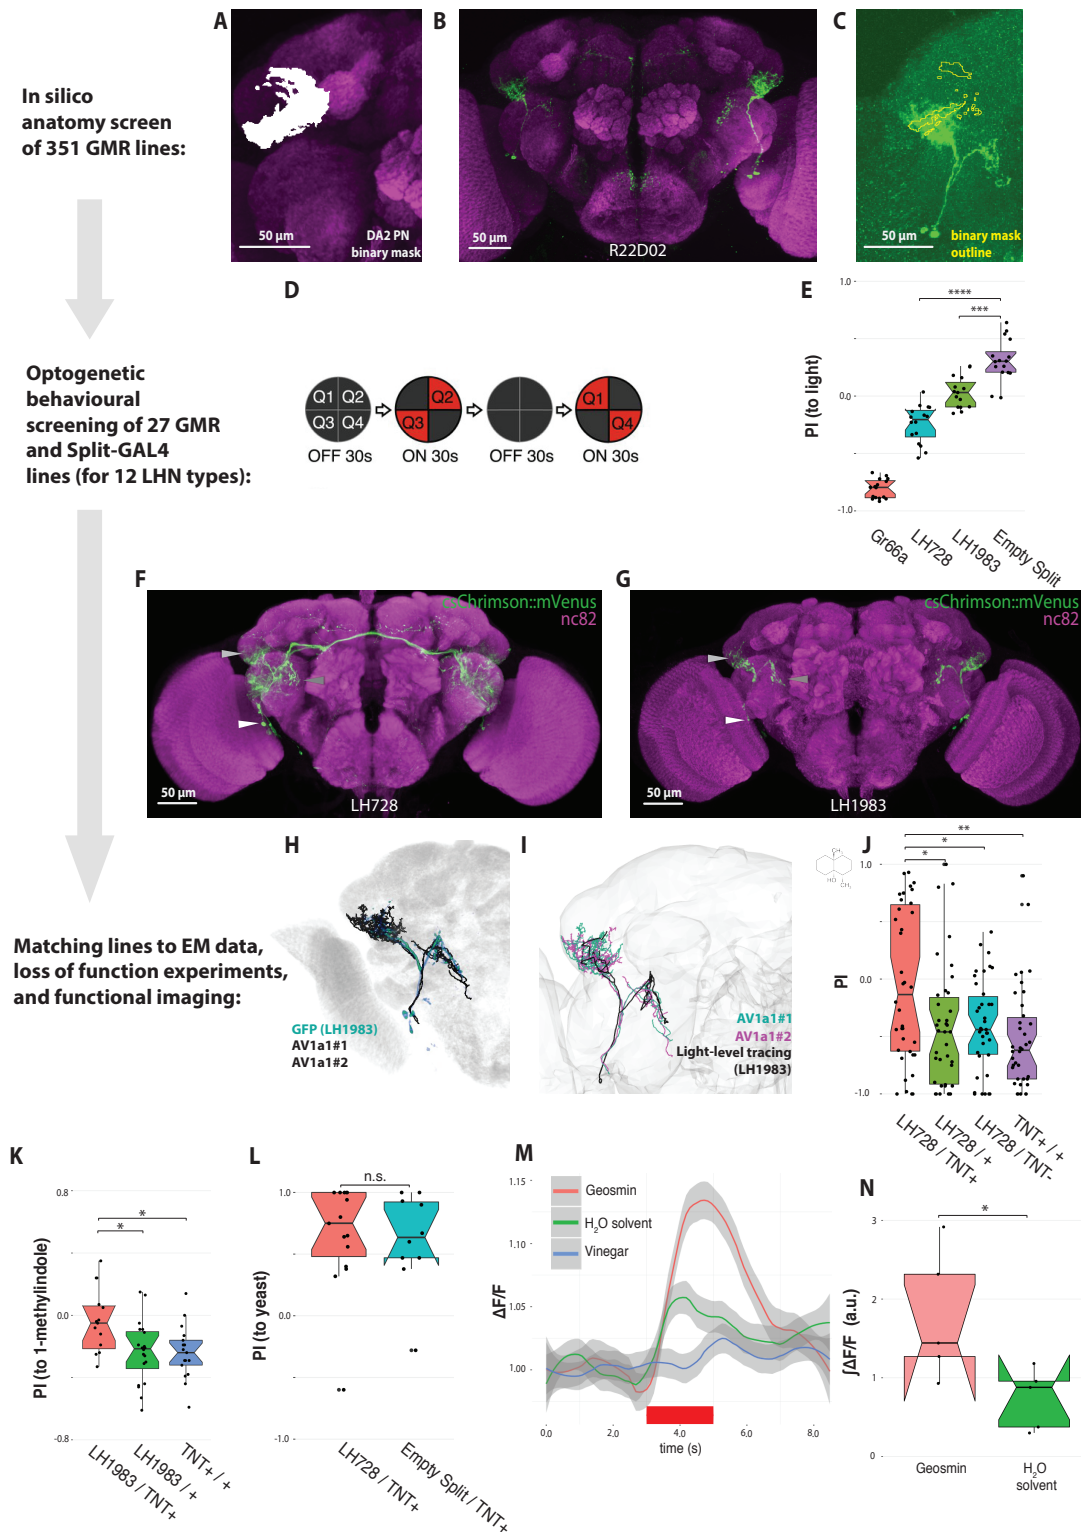

183 the screen and (37) for the apparatus). Only two of the tested  
184 driver lines triggered aversion in this assay (Figure 3E and  
185 Figure S3A, B and C): LH728 and LH1983 (Figure 3F and G).  
186 Both lines share a parental line (R76E07) and label ~ 10 neu-  
187 rons, with somas ventral and medial to the anterior ventrolat-  
188 eral protocerebrum (AVLP). Interestingly, both lines also con-  
189 tain the same two neurons with dendrites in the (ventral) LH  
190 and axons in the AVLP, and no other LHNs. The neurons are  
191 cholinergic (36), and appear morphologically very similar to  
192 the LHAV1a1 neurons found downstream of DA2 PNs in the  
193 EM volume (Figure 3H). To confirm this, we generated light-  
194 level tracings of the neurons in LH1983. As the processes of  
195 the two LHNs were in many places too close to resolve, the  
196 tracing resulted in a single hybrid skeleton of the two AV1  
197 neurons found in the line. However, overlaying the light-level  
198 tracing with LHAV1a1#1 and LHAV1a1#2 reveals a remark-  
199 ably similar morphology (Figure 3I). Moreover, a quantita-  
200 tive NBLAST (16) comparison to all the 33 neurons taking the  
201 AV1 tract in the EM volume shows that the top matches are  
202 LHAV1a1#1 (similarity score=0.69) and LHAV1a1#2 (similar-  
203 ity score=0.65), respectively. Intriguingly, These cells are one  
204 of only 3 out of 70 LHN cell types downstream of DA2 PNs  
205 that we identified with projections to the ventral rather than  
206 superior protocerebrum in the FAFB volume. There are three  
207 groups of AV1a-like neurons in the hemibrain, belonging to  
208 three classes: AVL02q\_a\_pct (3 cells), AVL02q\_b\_pct (4 cells)  
209 and AVL02q\_c\_pct (2 cells). A comparison of morphology and  
210 olfactory inputs shows that AVL02q\_c\_pct are the most simi-  
211 lar to FAFB LHAV1a1s (Figure 3I and J).

212 We also tested whether the LHAV1a1 neurons are neces-  
213 sary for geosmin avoidance by silencing their synaptic ac-  
214 tivity using tetanus toxin; this abolished geosmin avoidance  
215 in the egg-laying assay (Figure 3J). *In vivo* calcium imaging  
216 confirmed that the neurons respond to geosmin, but not to  
217 vinegar (a broadly coded attractive odorant) (Figure 3M and  
218 N). Taking these functional data together with the fact that  
219 no other AV1 tract neurons receive a significant amount of  
220 DA2 PN synaptic input in EM data, strongly suggests that the  
221 LHAV1a1 LHNs labelled by both driver lines are necessary  
222 and sufficient for some forms of odour avoidance.

223 Are the other 69 classes of lateral horn neurons that receive  
224 geosmin information then irrelevant to its processing? There  
225 are a number of possible explanations that could explain this  
226 large number of circuit elements.

227 The input tuning of the pair of LHAV1a1 neurons that we  
228 reconstructed is relatively broad, receiving input from multi-  
229 ple aversive PN channels (including DA2 and DL4). We there-  
230 fore wondered if these neurons have a general role in aversive  
231 odour processing. There are relatively few low concentration  
232 repulsive odorants reported in *Drosophila*. The DL4 ligand  
233 iridomyrmecin (9) is not commercially available and pilot  
234 control tests with a limited amount of synthetic compound  
235 (kindly shared by Jerrit Weißfog and Ales Svatos) did not show  
236 robust aversion in our egg laying assay (data not shown).  
237 We therefore tested another compound, 1-methylindole, a  
238 derivative of the bacterial metabolite indole (38), which we  
239 found to be aversive. Silencing LHAV1a1 neurons also abol-  
240 ished this egg-laying aversion (Figure 3K, see also Figure S3D-  
241 F, and methods). Indoles are detected by a phylogenetically  
242 closely related receptor Or43a (39, 40), which projects to the  
243 DA4l glomerulus (40). Intriguingly LHAV1a1 LHNs also re-

ceive strong input from DA4l PNs (Figure 2B). Importantly,  
flies were still attracted to yeast odour (Figure 3L), show-  
ing they are not anosmic or otherwise unable to respond to  
odours. Together these data provide evidence for functional  
integration of aversive odour channels within LHAV1a1 neu-  
rons, which appear to have a selective role in odour avoid-  
ance during egg-laying.

Combining functional and connectomics approaches,  
provides an almost unique opportunity to explore the brain-  
wide logic of olfactory processing. However, the consider-  
able divergence of the geosmin processing pathway when  
moving from second to third-order neurons, means that it  
is presently impossible to follow all of the connected LHNs  
deeper into the brain. Instead we focussed on two cell types  
that appeared of special interest from the results so far:  
LHAV1a1 and PV6a3 (an ideal example of an aversive inte-  
grator based on its PN inputs).

We identified 14 postsynaptic partners receiving 2 or more  
synapses downstream of PV6a3, the strongest of which ap-  
pears to be a neuron projecting to the suboesophageal zone  
(SEZ) (Fig S4A, B and C). However, as we did not perform an  
exhaustive reconstruction of the postsynaptic partners, there  
most likely are more than shown here. Nevertheless, this sug-  
gests that one next computational step in the circuit is to in-  
tegrate aversive odour signals with gustatory ones in the SEZ.

Downstream sampling from the LHAV1a1#1 axon iden-  
tified 44 postsynaptic partners, many shared with its sib-  
ling LHAV1a1#2 (Figure 4A, Figure S4D and E). Downstream  
sampling in both connectomes showed that LHAV1a1s share  
many postsynaptic partners, and, most notably, are all  
strongly connected to descending neurons (DNs) (Figure S4C  
and D), including two previously unreported DNs, which  
we have named DNp42 and DNp43, projecting to the nerve  
cord (Figure 4A). LHAV1a1 form many more direct connec-  
tions with DNs than our other strong DA2 targets (Figure S4.  
Another strong target is DNp06. However, while it receives  
~ 5.4% of LHAV1a1 output, LHAV1a1 input to this DN com-  
prises just 0.3% of the total.

We identified three sparse driver lines for DNp42 (Fig-  
ure 4B-D, and Figure S5A-C). Silencing DNp42 abolishes  
geosmin avoidance (Figure 4E), reproducing the phenotype  
seen at every step in this circuit, from sensory input to these  
descending neurons. We also optogenetically activated these  
DNs while observing the flies using high-speed videogra-  
phy (FlyPEZ assay (41)). Strikingly, light-activation triggered a  
consistent backing up phenotype (Figure 4F) and flies would  
occasionally take-off, similar to what is seen in response to  
looming visual stimuli (42). In the VNC, DNp42 axons ar-  
borise in all three thoracic neuromeres but stay close to the  
midline innervating the tectulum (an integrative area), avoid-  
ing the more lateral leg neuropils. They also innervate the  
accessory mesothoracic neuromere and ventral association  
centre, areas receiving sensory input from the wings and legs,  
respectively (43) (Figure S6A and B). There are no projections  
to the abdominal ganglion (which directly controls repro-  
ductive functions, including egg laying) and no obvious sex-  
ual dimorphism in any of these axonal arbours (Figure S6C).  
This anatomy is consistent with a pre-motor and/or sensory-  
motor integration function in locomotor behaviour rather  
than a direct impact on motoneurons or regulation of egg lay-  
ing.

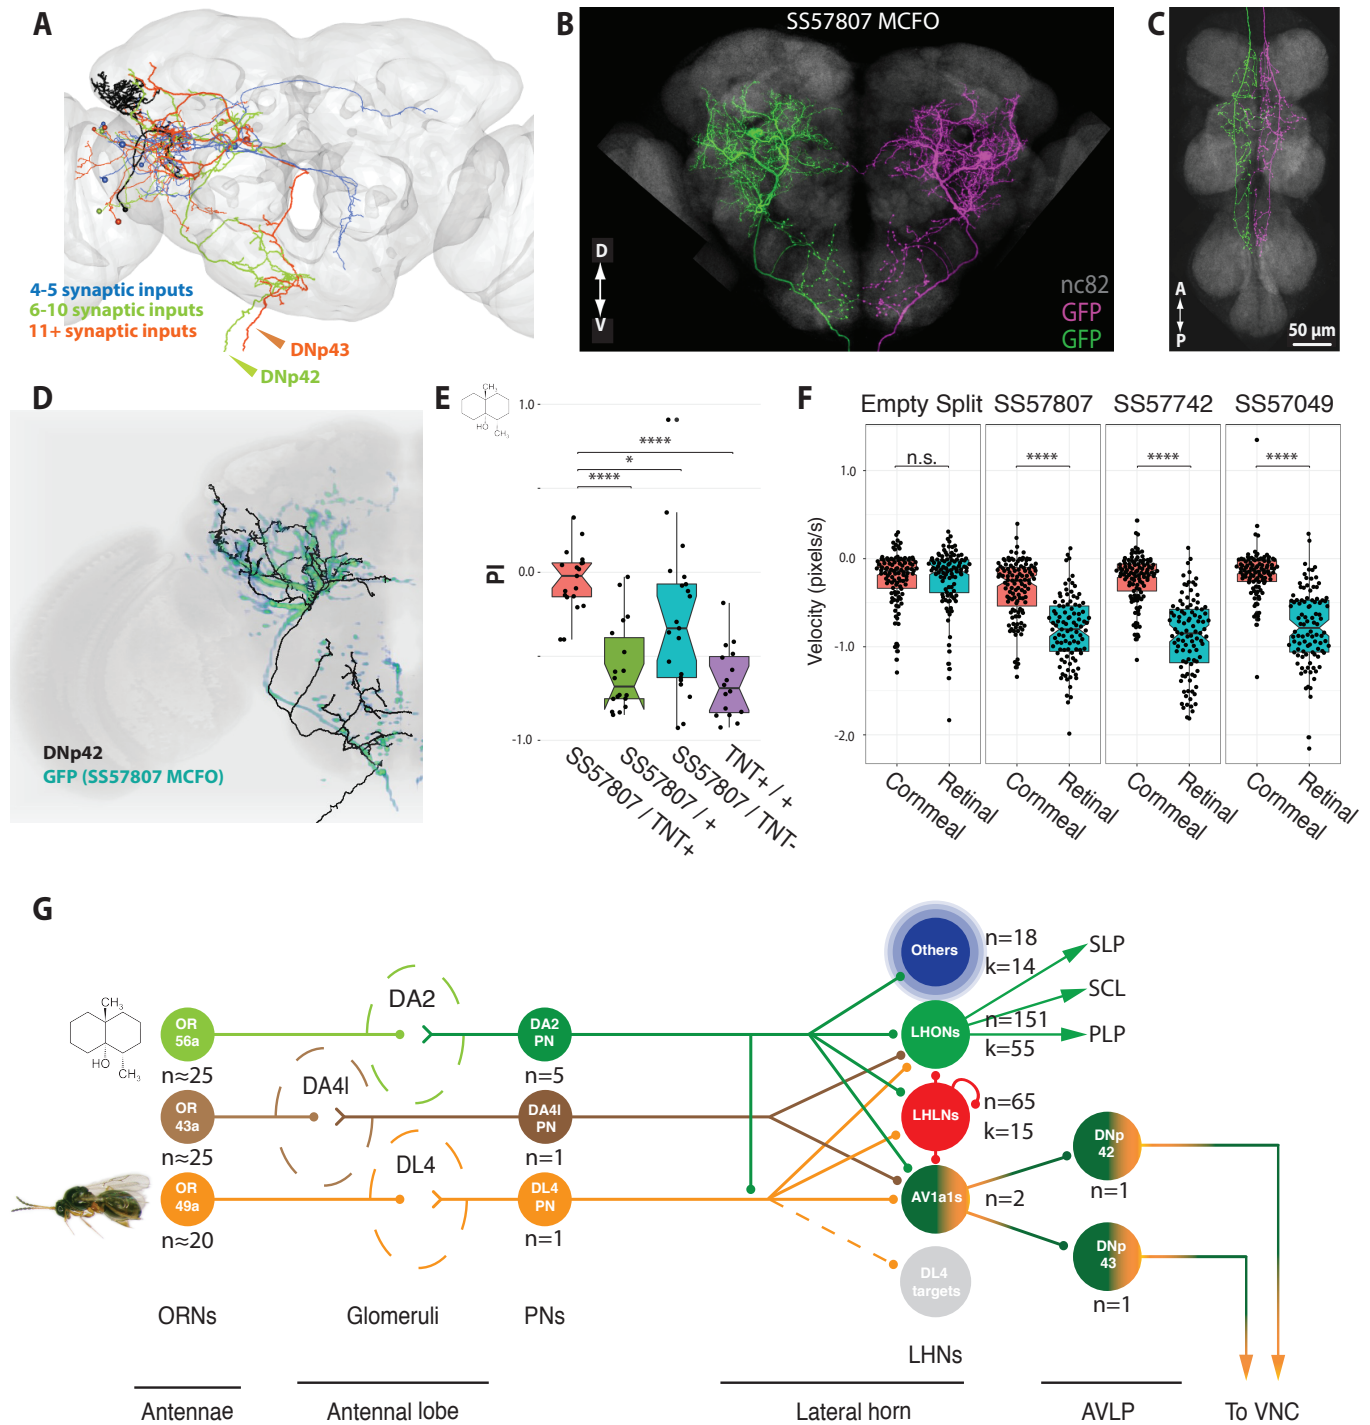

**Figure 4:** LHAV1a1 neurons synapse onto DNs that are necessary for geosmin avoidance and sufficient to trigger avoidance behavior. (A) Identified downstream targets of the LHAV1a1#1 with 4 or more synaptic inputs. Neurons are colour-coded according to number of synaptic inputs. Two descending neurons DNP43 (orange) and DNP42 (green) are highlighted with arrowheads. (B-C) MultiColor FlpOut (MCFO) labelling of putative DNP42 neurons in the brain (B) and VNC (C). (D) A 3D rendering of EM reconstruction of DNP42 (black) overlaid with the SS57807 expression pattern (green). (E) Egg-laying two-choice PI to geosmin while silencing DNP42 neurons (n=16-21). (F) Fly velocity in response to optogenetic stimulation of DNP42 neurons via three different driver lines (n=99-109). Significance values: \* p < 0.05 \*\*\*\* p < 0.0001 (G) A simplified schematic of the circuit. Geosmin is detected by Or56a ORNs that project to the AL where they synapse onto DA2 PNs, and local neurons (not shown). The DA2 PNs project to the LH (forming en passant synapses in the MB, not shown). In the LH, DA2 PNs form axo-axonic synapses with parasitic wasp pheromone processing DL4 PNs, and then synapse onto a large number of third-order neurons with varying tuning breadths. LHAV1a1 neurons receive input from multiple aversive PN channels (including DL4 and DA4I), and synapse onto DNs that trigger avoidance. Numbers of neurons (n) and clusters (k) are marked.

305 While in FAFB there is no exhaustive upstream tracing of  
306 DNp42, the autosegmentation of the hemibrain allows us to  
307 see its other inputs. LHAV1a1s comprise ~ 1.3% of all input  
308 to DNp42. The second strongest input to DNp42, comprising  
309 ~ 2.6% of all input, is a GABAergic mushroom body output  
310 neuron, MBON20(y1y2). This cell arborises in the y1 and y2  
311 lobes of the ventral accessory calyx of the mushroom body.  
312 These lobes receive axonal input from protocerebral pos-  
313 terior lateral dopaminergic neurons, which carry predomi-  
314 nantly aversive signals. This connectivity resembles the cir-  
315 cuit for learned-innate interaction described in (44), though  
316 at the level of DNs, rather than LHNs, and with the opposite  
317 valence, possibly providing a mechanism by which learned  
318 and innate olfactory information is integrated to produce ap-  
319 propriate behavioural responses.

320 All animals need to solve similar challenges to survive and  
321 reproduce in a complex environment. Avoiding pathogens  
322 and parasites are some of the ubiquitous ones. Here we trace  
323 a microbial-odour processing pathway from sensory neu-  
324 rons all the way through the brain to descending neurons  
325 innervating the fly's homologue of the spinal cord (see Fig-  
326 ure 4G, for a summary of the circuit). We have identified cir-  
327 cuit motifs including multiple levels of valence specific con-  
328 vergence, including clear evidence for convergence of aver-  
329 sive PNs onto common targets, which tend to be co-located  
330 in space. This supports the idea of valence-based topography  
331 as one organising principle of the LH (8, 10, 45). More sur-  
332 prisingly, we also found that central olfactory layers show a  
333 highly diverging organisation, even for stimuli that are ini-  
334 tially coded in a labelled line fashion. This contrasts with our  
335 functional data: we trace a single linear pathway essential for  
336 aversive egg-laying behaviour, as supported by neuronal ac-  
337 tivation and/or silencing experiments at each of the 4 lay-  
338 ers traversing the brain. Although our analysis of fourth or-  
339 der neurons is far from exhaustive, we have identified few  
340 other direct connections to a descending neuron. Therefore  
341 this synaptic pathway is probably unusually shallow. This in  
342 turn may imply both a particular biological significance and  
343 make these neurons more sensitive to simple experimental  
344 activation or silencing experiments.

345 Comparing our connectomics and experimental results  
346 challenges us to think about what connection strengths are  
347 behaviorally relevant. (46) has recently suggested a classifica-  
348 tion of major pathways, with 100 or more inputs, and minor  
349 pathways, with fewer than about 10. Summing inputs from  
350 all 5 DA2 PNs we identified just three target neurons meet-  
351 ing this criterion (range 107-176 connections), not includ-  
352 ing the LHAV1a1s, which are individually only the 42nd and  
353 90th strongest DA2 targets by synapse number. Normalising  
354 by the total number of inputs, in the majority of cases DA2  
355 PNs accounted for <5% of the input to target neurons, and  
356 just 1.6% of the input to the reconstructed LHAV1a1 neurons.  
357 Thus, while absolute thresholds are a useful rule of thumb,  
358 it is likely that different criteria will be necessary in different  
359 brain areas and between different kinds of neurons. This will  
360 be of major significance in interpreting the dense whole brain  
361 connectomics datasets in *Drosophila* recently released (12),  
362 with larger brains likely following within the space of a few  
363 years (47).

## References

- [1] Mark Schaller. The behavioural immune system and the psychology of human sociality. *Philos. Trans. R. Soc. Lond. B Biol. Sci.*, 366(1583):3418–3426, December 2011.
- [2] Marcus C Stensmyr, Hany K M Dweck, Abu Farhan, Irene Ibba, Antonia Strutz, Latha Mukunda, Jeanine Linz, Veit Grabe, Kathrin Steck, Sofia Lavista-Llanos, Dieter Wicher, Silke Sachse, Markus Knaden, Paul G Becher, Yoichi Seki, and Bill S Hansson. A conserved dedicated olfactory circuit for detecting harmful microbes in *Drosophila*. *Cell*, 151(6):1345–1357, December 2012.
- [3] Veit Grabe, Amelie Baschwitz, Hany K M Dweck, Sofia Lavista-Llanos, Bill S Hansson, and Silke Sachse. Elucidating the neuronal architecture of olfactory glomeruli in the *Drosophila* antennal lobe. *Cell Rep.*, 16(12):3401–3413, September 2016.
- [4] Nicolas Y Masse, Glenn C Turner, and Gregory S X E Jefferis. Olfactory information processing in *Drosophila*. *Current Biology*, 19(16):R700–R713, 2009.
- [5] Arnim Jenett, Gerald M Rubin, Teri-T B Ngo, David Shepherd, Christine Murphy, Heather Dionne, Barret D Pfeiffer, Amanda Cavallaro, Donald Hall, Jennifer Jeter, Nirmala Iyer, Dona Fetter, Joanna H Hausenfluck, Hanchuan Peng, Eric T Trautman, Robert R Svirskas, Eugene W Myers, Zbigniew R Iwinski, Yoshinori Aso, Gina M DePasquale, Adrienne Enos, Phuson Hulamm, Shing Chun Benny Lam, Hsing-Hsi Li, Todd R Laverty, Fuhui Long, Lei Qu, Sean D Murphy, Konrad Rokicki, Todd Safford, Kshiti Shaw, Julie H Simpson, Allison Sowell, Susana Tae, Yang Yu, and Christopher T Zugates. A GAL4-driver line resource for *Drosophila* neurobiology. *Cell Rep.*, 2(4):991–1001, October 2012.
- [6] Johannes Kohl, Julian Ng, Sebastian Cachero, Ernesto Ciabatti, Michael-John Dolan, Ben Sutcliffe, Adam Tozer, Sabine Ruehle, Daniel Krueger, Shahar Frechter, Tiago Branco, Marco Tripodi, and Gregory S X E Jefferis. Ultrafast tissue staining with chemical tags. *Proc. Natl. Acad. Sci. U. S. A.*, 111(36):E3805–14, September 2014.
- [7] Sean T Sweeney, Kendal Broadie, John Keane, Heiner Niemann, and Cahir J O’Kane. Targeted expression of tetanus toxin light chain in *Drosophila* specifically eliminates synaptic transmission and causes behavioral defects. *Neuron*, 14(2):341–351, 1995.
- [8] Sonia G Chin, Sarah E Maguire, Paavo Huoviala, Gregory S X E Jefferis, and Christopher J Potter. Olfactory neurons and brain centers directing oviposition decisions in *Drosophila*. *Cell Rep.*, 24(6):1667–1678, August 2018.
- [9] Shimaa A M Ebrahim, Hany K M Dweck, Johannes Stökl, John E Hofferberth, Federica Trona, Kerstin Weniger, Jürgen Rybak, Yoichi Seki, Marcus C Stensmyr, Silke Sachse, Bill S Hansson, and Markus Knaden. *Drosophila* avoids parasitoids by sensing their semiochemicals via a dedicated olfactory circuit. *PLoS Biol.*, 13(12):e1002318, December 2015.



- 419 [10] Gregory S X E Jefferis, Christopher J Potter, Alexander M  
420 Chan, Elizabeth C Marin, Torsten Rohlffing, Calvin R  
421 Maurer, Jr, and Liqun Luo. Comprehensive maps of  
422 *Drosophila* higher olfactory centers: spatially segre-  
423 gated fruit and pheromone representation. *Cell*, 128(6):  
424 1187–1203, March 2007.
- 425 [11] Zhihao Zheng, J Scott Lauritzen, Eric Perlman, Ca-  
426 menzind G Robinson, Matthew Nichols, Daniel Milkie,  
427 Omar Torrens, John Price, Corey B Fisher, Nadiya Shar-  
428 ifi, Steven A Calle-Schuler, Lucia Kmecova, Iqbal J Ali,  
429 Bill Karsh, Eric T Trautman, John A Bogovic, Philipp  
430 Hanslovsky, Gregory S X E Jefferis, Michael Kazhdan,  
431 Khaled Khairy, Stephan Saalfeld, Richard D Fetter, and  
432 Davi D Bock. A complete electron microscopy volume  
433 of the brain of adult *Drosophila melanogaster*. *Cell*, 174  
434 (3):730–743.e22, July 2018.
- 435 [12] Louis K Scheffer, C Shan Xu, Michal Januszewski,  
436 Zhiyuan Lu, Shin-ya Takemura, Kenneth J Hayworth,  
437 Gary B Huang, Kazunori Shinomiya, Jeremy Maitlin-  
438 Shepard, Stuart Berg, Jody Clements, Philip M Hubbard,  
439 William T Katz, Lowell Umayam, Ting Zhao, David Ack-  
440 erman, Tim Blakely, John Bogovic, Tom Dolafi, Dagmar  
441 Kainmueller, Takashi Kawase, Khaled A Khairy, Laramie  
442 Leavitt, Peter H Li, Larry Lindsey, Nicole Neubarth,  
443 Donald J Olbris, Hideo Otsuna, Eric T Trautman,  
444 Masayoshi Ito, Alexander S Bates, Jens Goldammer,  
445 Tanya Wolff, Robert Svirskas, Philipp Schlegel, Erika  
446 Neace, Christopher J Knecht, Chelsea X Alvarado,  
447 Dennis A Bailey, Samantha Ballinger, Jolanta A Bor-  
448 ycz, Brandon S Canino, Natasha Cheatham, Michael  
449 Cook, Marisa Dreher, Octave Duclos, Bryon Eubanks,  
450 Kelli Fairbanks, Samantha Finley, Nora Forknall, Au-  
451 drey Francis, Gary Patrick Hopkins, Emily M Joyce,  
452 SungJin Kim, Nicole A Kirk, Julie Kovalyak, Shirley A  
453 Lauchie, Alanna Lohff, Charli Maldonado, Emily A Man-  
454 ley, Sari McLin, Caroline Mooney, Miatta Ndama, Omo-  
455 tara Ogundeyi, Nneoma Okeoma, Christopher Ordish,  
456 Nicholas Padilla, Christopher M Patrick, Tyler Pater-  
457 son, Elliott E Phillips, Emily M Phillips, Neha Rampally,  
458 Caitlin Ribeiro, Madelaine K Robertson, Jon Thom-  
459 son Rymer, Sean M Ryan, Megan Sammons, Anne K  
460 Scott, Ashley L Scott, Aya Shinomiya, Claire Smith,  
461 Kelsey Smith, Natalie L Smith, Margaret A Sobeski, Alia  
462 Suleiman, Jackie Swift, Satoko Takemura, Iris Talebi,  
463 Dorota Tarnogorska, Emily Tenshaw, Temour Tokhi,  
464 John J Walsh, Tansy Yang, Jane Anne Horne, Feng Li,  
465 Ruchi Parekh, Patricia K Rivlin, Vivek Jayaraman, Marta  
466 Costa, Gregory SXE Jefferis, Kei Ito, Stephan Saalfeld,  
467 Reed George, Ian A Meinertzhagen, Gerald M Rubin,  
468 Harald F Hess, Viren Jain, and Stephen M Plaza. A  
469 connectome and analysis of the adult *Drosophila* cen-  
470 tral brain. *eLife*, 9:e57443, sep 2020. ISSN 2050-084X.  
471 doi: 10.7554/eLife.57443. URL [https://doi.org/10.7554/](https://doi.org/10.7554/eLife.57443)  
472 [eLife.57443](https://doi.org/10.7554/eLife.57443).
- 473 [13] James M Jeanne and Rachel I Wilson. Convergence, di-  
474 vergence, and reconvergence in a feedforward network  
475 improves neural speed and accuracy. *Neuron*, 88(5):  
476 1014–1026, December 2015.
- [14] Alexander S. Bates, Philipp Schlegel, Ruairi J.V. Roberts, 477  
Nikolas Drummond, Imaan F.M. Tamimi, Robert Turn- 478  
bull, Xincheng Zhao, Elizabeth C. Marin, Patricia D. 479  
Popovici, Serene Dhawan, Arian Jamasb, Alexandre 480  
Javier, Laia Serratos Capdevila, Feng Li, Gerald M. Ru- 481  
bin, Scott Waddell, Davi D. Bock, Marta Costa, and Gre- 482  
gory S.X.E. Jefferis. Complete connectomic reconstruc- 483  
tion of olfactory projection neurons in the fly brain. 484  
*Current Biology*, 30(16):3183 – 3199.e6, 2020. ISSN 485  
0960-9822. doi: [https://doi.org/10.1016/j.cub.2020.](https://doi.org/10.1016/j.cub.2020.06.042) 486  
06.042. URL [http://www.sciencedirect.com/science/](http://www.sciencedirect.com/science/article/pii/S0960982220308587) 487  
[article/pii/S0960982220308587](http://www.sciencedirect.com/science/article/pii/S0960982220308587). 488
- [15] Ann-Shyn Chiang, Chih-Yung Lin, Chao-Chun Chuang, 489  
Hsiu-Ming Chang, Chang-Huain Hsieh, Chang-Wei Yeh, 490  
Chi-Tin Shih, Jian-Jheng Wu, Guo-Tzau Wang, Yung- 491  
Chang Chen, Cheng-Chi Wu, Guan-Yu Chen, Yu-Tai 492  
Ching, Ping-Chang Lee, Chih-Yang Lin, Hui-Hao Lin, 493  
Chia-Chou Wu, Hao-Wei Hsu, Yun-Ann Huang, Jing- 494  
Yi Chen, Hsin-Jung Chiang, Chun-Fang Lu, Ru-Fen 495  
Ni, Chao-Yuan Yeh, and Jenn-Kang Hwang. Three- 496  
dimensional reconstruction of brain-wide wiring net- 497  
works in *Drosophila* at single-cell resolution. *Curr. Biol.*, 498  
21(1):1–11, January 2011. 499
- [16] Marta Costa, James D Manton, Aaron D Ostrovsky, Stef- 500  
fen Prohaska, and Gregory S X E Jefferis. NBLAST: Rapid, 501  
sensitive comparison of neuronal structure and con- 502  
struction of neuron family databases. *Neuron*, 91(2): 503  
293–311, July 2016. 504
- [17] Shahar Frechter, Alexander Shakeel Bates, Sina 505  
Tootoonian, Michael-John Dolan, James Manton, 506  
Arian Rokkum Jamasb, Johannes Kohl, Davi Bock, and 507  
Gregory Jefferis. Functional and anatomical speci- 508  
ficity in a higher olfactory centre. *eLife*, 8:e44590, may 509  
2019. ISSN 2050-084X. doi: 10.7554/eLife.44590. URL 510  
<https://doi.org/10.7554/eLife.44590>. 511
- [18] Kei Ito, Kazunori Shinomiya, Masayoshi Ito, J Dou- 512  
glas Armstrong, George Boyan, Volker Hartenstein, Stef- 513  
fen Harzsch, Martin Heisenberg, Uwe Homberg, Arnim 514  
Jenett, Haig Keshishian, Linda L Restifo, Wolfgang 515  
Rössler, Julie H Simpson, Nicholas J Strausfeld, Roland 516  
Strauss, Leslie B Vosshall, and Insect Brain Name Work- 517  
ing Group. A systematic nomenclature for the insect 518  
brain. *Neuron*, 81(4):755–765, February 2014. 519
- [19] Azusa Kamikouchi, Takashi Shimada, and Kei Ito. 520  
Comprehensive classification of the auditory sensory 521  
projections in the brain of the fruit fly *Drosophila* 522  
*melanogaster*. *J. Comp. Neurol.*, 499(3):317–356, 2006. 523
- [20] Tetsuya Miyamoto and Hubert Amrein. Suppression of 524  
male courtship by a *Drosophila* pheromone receptor. 525  
*Nat. Neurosci.*, 11(8):874–876, August 2008. 526
- [21] Vanessa Ruta, Sandeep Robert Datta, Maria Luisa Vas- 527  
concelos, Jessica Freeland, Loren L Looger, and Richard 528  
Axel. A dimorphic pheromone circuit in *Drosophila* 529  
from sensory input to descending output. *Nature*, 468 530  
(7324):686–690, 2010. 531

- 532 [22] E Josephine Clowney, Shinya Iguchi, Jennifer J Bussell, 586  
533 Elias Scheer, and Vanessa Ruta. Multimodal chemosen- 587  
534 sory circuits controlling male courtship in *Drosophila*. 588  
535 *Neuron*, 87(5):1036–1049, September 2015.
- 536 [23] Chi-Tin Shih, Olaf Sporns, Shou-Li Yuan, Ta-Shun Su, 590  
537 Yen-Jen Lin, Chao-Chun Chuang, Ting-Yuan Wang, 591  
538 Chung-Chuang Lo, Ralph J Greenspan, and Ann-Shyn 592  
539 Chiang. Connectomics-based analysis of information 593  
540 flow in the *Drosophila* brain. *Curr. Biol.*, 25(10):1249– 594  
541 1258, May 2015.
- 542 [24] Johannes Kohl, Aaron D Ostrovsky, Shahar Frechter, and 596  
543 Gregory S X E Jefferis. A bidirectional circuit switch 597  
544 reroutes pheromone signals in male and female brains. 598  
545 *Cell*, 155(7):1610–1623, December 2013.
- 546 [25] Hongbo Jiang, Ankhbayar Lkhagva, Ivana Daubnerová, 599  
547 Hyo-Seok Chae, Ladislav Šimo, Sung-Hwan Jung, Yeu- 600  
548 Kyung Yoon, Na-Rae Lee, Jae Young Seong, Dušan 601  
549 Žitňan, Yoonseong Park, and Young-Joon Kim. Natal- 602  
550 isin, a tachykinin-like signaling system, regulates sexual 603  
551 activity and fecundity in insects. *Proc. Natl. Acad. Sci. U.* 604  
552 *S. A.*, 110(37):E3526–34, September 2013.
- 553 [26] Elizabeth C. Marin, Laurin Büld, Maria Theiss, Tat- 607  
554 evik Sarkissian, Ruairí J.V. Roberts, Robert Turnbull, 608  
555 Imaan F.M. Tamimi, Markus W. Pleijzier, Willem J. 609  
556 Laursen, Nik Drummond, Philipp Schlegel, Alexander S. 610  
557 Bates, Feng Li, Matthias Landgraf, Marta Costa, Davi D. 611  
558 Bock, Paul A. Garrity, and Gregory S.X.E. Jefferis. Con- 612  
559 nectomics analysis reveals first-, second-, and third- 613  
560 order thermosensory and hygrosensory neurons in the 614  
561 adult drosophila brain. *Current Biology*, 30(16):3167 – 615  
562 3182.e4, 2020. ISSN 0960-9822. doi: [https://doi.org/10.](https://doi.org/10.1016/j.cub.2020.06.028) 616  
563 [1016/j.cub.2020.06.028](https://doi.org/10.1016/j.cub.2020.06.028). URL [http://www.sciencedirect.](http://www.sciencedirect.com/science/article/pii/S0960982220308447) 617  
564 [com/science/article/pii/S0960982220308447](http://www.sciencedirect.com/science/article/pii/S0960982220308447).
- 565 [27] Minrong Ai, Soohong Min, Yael Grosjean, Charlotte 620  
566 Leblanc, Rati Bell, Richard Benton, and Greg S B Suh. 621  
567 Acid sensing by the *Drosophila* olfactory system. *Nature*, 468(7324):691–695, 2010. 622
- 569 [28] Markus Knaden, Antonia Strutz, Jawaid Ahsan, Silke 623  
570 Sachse, and Bill S Hansson. Spatial representation of 624  
571 odorant valence in an insect brain. *Cell Rep.*, 1(4):392– 625  
572 399, 2012.
- 573 [29] Julia L Semmelhack and Jing W Wang. Select *Drosophila* 626  
574 glomeruli mediate innate olfactory attraction and aver- 627  
575 sion. *Nature*, 459(7244):218–223, May 2009.
- 576 [30] Greg S B Suh, Allan M Wong, Anne C Hergarden, Jing W 628  
577 Wang, Anne F Simon, Seymour Benzer, Richard Axel, 629  
578 and David J Anderson. A single population of olfac- 630  
579 tory sensory neurons mediates an innate avoidance be- 631  
580 haviour in *Drosophila*. *Nature*, 431(7010):854–859, Oc- 632  
581 tober 2004.
- 582 [31] Suzan Mansourian, Jacob Corcoran, Anders Enjin, 633  
583 Christer Löfstedt, Marie Dacke, and Marcus C Stensmyr. 634  
584 Fecal-Derived phenol induces Egg-Laying aversion in 635  
585 *Drosophila*. *Curr. Biol.*, 26(20):2762–2769, October 2016.
- [32] Suzan Mansourian and Marcus C Stensmyr. The chem- 636  
ical ecology of the fly. *Curr. Opin. Neurobiol.*, 34:95–102, 637  
October 2015. 638
- [33] Daniel Münch and C Giovanni Galizia. DoOR 2.0 - com- 639  
prehensive mapping of *Drosophila melanogaster* odor- 640  
ant responses. *Sci. Rep.*, 6(1), 2016. 641
- [34] Amina Kurtovic, Alexandre Widmer, and Barry J Dick- 642  
son. A single class of olfactory neurons mediates be- 643  
havioural responses to a *Drosophila* sex pheromone. 644  
*Nature*, 446(7135):542–546, March 2007. 645
- [35] Johannes Kohl, Paavo Huoviala, and Gregory Sxe Jefferis. 646  
Pheromone processing in *Drosophila*. *Curr. Opin. Neu-* 647  
*robiol.*, 34:149–157, October 2015. 648
- [36] Michael-John Dolan, Shahar Frechter, Alexander Sha- 649  
keel Bates, Chuntao Dan, Paavo Huoviala, Ruairí Jv 650  
Roberts, Philipp Schlegel, Serene Dhawan, Remy Ta- 651  
bano, Heather Dionne, Christina Christoforou, Kari 652  
Close, Ben Sutcliffe, Bianca Giuliani, Feng Li, Marta 653  
Costa, Gudrun Ihrke, Geoffrey Wilson Meissner, Davi D 654  
Bock, Yoshinori Aso, Gerald M Rubin, and Gregory Sxe 655  
Jefferis. Neurogenetic dissection of the lateral horn re- 656  
veals major outputs, diverse behavioural functions, and 657  
interactions with the mushroom body. *Elife*, 8, May 658  
2019. 659
- [37] Yoshinori Aso, Divya Sitaraman, Toshiharu Ichinose, 660  
Karla R Kaun, Katrin Vogt, Ghislain Belliart-Guérin, 661  
Pierre-Yves Plaçais, Alice A Robie, Nobuhiro Yama- 662  
gata, Christopher Schnaitmann, William J Rowell, Re- 663  
becca M Johnston, Teri-T B Ngo, Nan Chen, Wyatt 664  
Korff, Michael N Nitabach, Ulrike Heberlein, Thomas 665  
Preat, Kristin M Branson, Hiromu Tanimoto, and Ger- 666  
ald M Rubin. Mushroom body output neurons encode 667  
valence and guide memory-based action selection in 668  
*Drosophila*. *Elife*, 3:e04580, December 2014. 669
- [38] Jin-Hyung Lee and Jintae Lee. Indole as an intercellular 670  
signal in microbial communities. *FEMS Microbiol. Rev.*, 671  
34(4):426–444, July 2010. 672
- [39] Ian W Keeseey, Jin Zhang, Ana Depetris-Chauvin, 673  
George F Obiero, Markus Knaden, and Bill S Hans- 674  
son. Evolution of a pest: towards the complete neu- 675  
roethology of *Drosophila suzukii* and the subgenus 676  
sophophora. *bioRxiv*, July 2019. 677
- [40] Africa Couto, Mattias Alenius, and Barry J Dickson. 678  
Molecular, anatomical, and functional organization of 679  
the *Drosophila* olfactory system. *Curr. Biol.*, 15(17): 680  
1535–1547, September 2005. 681
- [41] W Ryan Williamson, Martin Y Peek, Patrick Breads, 682  
Brian Coop, and Gwyneth M Card. Tools for rapid 683  
High-Resolution behavioral phenotyping of automati- 684  
cally isolated *Drosophila*. *Cell Rep.*, 25(6):1636–1649.e5, 685  
November 2018. 686
- [42] Ming Wu, Aljoscha Nern, W Ryan Williamson, Mai M 687  
Morimoto, Michael B Reiser, Gwyneth M Card, and Ger- 688  
ald M Rubin. Visual projection neurons in the lobula 689

- 640 link feature detection to distinct behavioral programs. 693  
641 *Elife*, 5, December 2016. 694
- 642 [43] Lalanti Venkatasubramanian and Richard S Mann. The 695  
643 development and assembly of the *Drosophila* adult ven- 696  
644 tral nerve cord. *Curr. Opin. Neurobiol.*, 56:135–143, June 697  
645 2019. 698
- 646 [44] Michael-John Dolan, Ghislain Belliard-Guérin, Alexan- 699  
647 der Shakeel Bates, Shahar Frechter, Aurélie Lampin- 700  
648 Saint-Amaux, Yoshinori Aso, Ruairí JV Roberts, Philipp 701  
649 Schlegel, Allan Wong, Adnan Hammad, et al. Communi- 702  
650 cation from learned to innate olfactory processing centers 703  
651 is required for memory retrieval in drosophila. *Neu- 704  
652 ron*, 100(3):651–668, 2018. 705
- 653 [45] Antonia Strutz, Jan Soelter, Amelie Baschwitz, Abu 706  
654 Farhan, Veit Grabe, Jürgen Rybak, Markus Knaden, 707  
655 Michael Schmuker, Bill S Hansson, and Silke Sachse. 708  
656 Decoding odor quality and intensity in the *Drosophila* 709  
657 brain. *Elife*, 3:e04147, December 2014. 710
- 658 [46] Ian A Meinertzhagen. Of what use is connectomics? a 711  
659 personal perspective on the connectome. *J. Exp. Biol.*, 712  
660 221(Pt 10), May 2018. 713
- 661 [47] Louis K Scheffer and Ian A Meinertzhagen. The fly brain 714  
662 atlas. *Annu. Rev. Cell Dev. Biol.*, 35:637–653, October 715  
663 2019. 716
- 664 [48] Nathan C Klapoetke, Yasunobu Murata, Sung Soo Kim, 717  
665 Stefan R Pulver, Amanda Birdsey-Benson, Yong Ku Cho, 718  
666 Tania K Morimoto, Amy S Chuong, Eric J Carpenter, Zhi- 719  
667 jian Tian, Jun Wang, Yinlong Xie, Zhixiang Yan, Yong 720  
668 Zhang, Brian Y Chow, Barbara Surek, Michael Melko- 721  
669 nian, Vivek Jayaraman, Martha Constantine-Paton, 722  
670 Gane Ka-Shu Wong, and Edward S Boyden. Independ- 723  
671 ent optical excitation of distinct neural populations. 724  
672 *Nat. Methods*, 11(3):338–346, March 2014. 725
- 673 [49] C Dustin Rubinstein, Patricia K Rivlin, and Ron R 726  
674 Hoy. Genetic feminization of the thoracic nervous 727  
675 system disrupts courtship song in male *Drosophila* 728  
676 melanogaster. *J. Neurogenet.*, 24(4):234–245, December 729  
677 2010. 730
- 678 [50] Haojiang Luan, Nathan C Peabody, Charles R Vinson, 731  
679 and Benjamin H White. Refined spatial manipulation 732  
680 of neuronal function by combinatorial restriction of 733  
681 transgene expression. *Neuron*, 52(3):425–436, Novem- 734  
682 ber 2006. 735
- 683 [51] Shigehiro Namiki, Michael H Dickinson, Allan M Wong, 736  
684 Wyatt Korff, and Gwyneth M Card. The functional or- 737  
685 ganization of descending sensory-motor pathways in. 738  
686 *Elife*, 7, June 2018. 739
- 687 [52] Heather Dionne, Karen L. Hibbard, Amanda Cavallaro, 740  
688 Jui-Chun Kao, and Gerald M. Rubin. Genetic reagents 741  
689 for making split-gal4 lines in drosophila. *Genetics*, 209 742  
690 (1):31–35, 2018. ISSN 0016-6731. doi: 10.1534/genetics. 743  
691 118.300682. URL [https://www.genetics.org/content/](https://www.genetics.org/content/209/1/31) 744  
692 [209/1/31](https://www.genetics.org/content/209/1/31). 745
- [53] Laszlo Tirian and Barry J Dickson. The VT GAL4, LexA, 693  
and split-GAL4 driver line collections for targeted ex- 694  
pression in the *Drosophila* nervous system. *bioRxiv*, Oc- 695  
tober 2017. 696
- [54] Aljoscha Nern, Barret D Pfeiffer, and Gerald M Rubin. 697  
Optimized tools for multicolor stochastic labeling reveal 698  
diverse stereotyped cell arrangements in the fly visual 699  
system. *Proc. Natl. Acad. Sci. U. S. A.*, 112(22):E2967–76, 700  
June 2015. 701
- [55] Yoshinori Aso, Daisuke Hattori, Yang Yu, Rebecca M 702  
Johnston, Nirmala A Iyer, Teri-Tb Ngo, Heather Dionne, 703  
L F Abbott, Richard Axel, Hiromu Tanimoto, and Ger- 704  
ald M Rubin. The neuronal architecture of the mush- 705  
room body provides a logic for associative learning. 706  
*eLife*, 3, 2014. 707
- [56] Stephan Saalfeld, Albert Cardona, Volker Hartenstein, 708  
and Pavel Tomancak. CATMAID: collaborative annota- 709  
tion toolkit for massive amounts of image data. *Bioin- 710  
formatics*, 25(15):1984–1986, August 2009. 711
- [57] Casey M Schneider-Mizell, Stephan Gerhard, Mark Lon- 712  
gair, Tom Kazimiers, Feng Li, Maarten F Zwart, An- 713  
drew Champion, Frank M Midgley, Richard D Fetter, 714  
Stephan Saalfeld, and Albert Cardona. Quantitative 715  
neuroanatomy for connectomics in *Drosophila*. *Elife*, 5, 716  
March 2016. 717
- [58] Nicolas Y Masse, Sebastian Cachero, Aaron D Ostrovsky, 718  
and Gregory S X E Jefferis. A mutual information ap- 719  
proach to automate identification of neuronal clusters 720  
in *Drosophila* brain images. *Front. Neuroinform.*, 6:21, 721  
June 2012. 722
- [59] Alexander Shakeel Bates, James D Manton, Sridhar R 723  
Jagannathan, Marta Costa, Philipp Schlegel, Torsten 724  
Rohlfing, and Gregory SXE Jefferis. The natverse, a 725  
versatile toolbox for combining and analysing neuro- 726  
anatomical data. *eLife*, 9:e53350, apr 2020. ISSN 2050- 727  
084X. doi: 10.7554/eLife.53350. URL [https://doi.org/10.](https://doi.org/10.7554/eLife.53350) 728  
[7554/eLife.53350](https://doi.org/10.7554/eLife.53350). 729
- [60] Robert Court, Shigehiro Namiki, J. Douglas Armstrong, 730  
Jana Börner, Gwyneth Card, Marta Costa, Michael Dick- 731  
inson, Carsten Duch, Wyatt Korff, Richard Mann, David 732  
Merritt, Rod K. Murphey, Andrew M. Seeds, Troy Shi- 733  
rangi, Julie H. Simpson, James W. Truman, John C. 734  
Tuthill, Darren W. Williams, and David Shepherd. A sys- 735  
tematic nomenclature for the drosophila ventral nerve 736  
cord. *Neuron*, 107(6):1071 – 1079.e2, 2020. ISSN 737  
0896-6273. doi: [https://doi.org/10.1016/j.neuron.2020.](https://doi.org/10.1016/j.neuron.2020.08.005) 738  
[08.005](https://doi.org/10.1016/j.neuron.2020.08.005). URL [http://www.sciencedirect.com/science/](http://www.sciencedirect.com/science/article/pii/S0896627320306127) 739  
[article/pii/S0896627320306127](http://www.sciencedirect.com/science/article/pii/S0896627320306127). 740
- [61] Sebastian Cachero, Aaron D Ostrovsky, Jai Y Yu, Barry J 741  
Dickson, and Gregory S X E Jefferis. Sexual dimorphism 742  
in the fly brain. *Curr. Biol.*, 20(18):1589–1601, September 743  
2010. 744
- [62] Torsten Rohlfing and Calvin R Maurer, Jr. Nonrigid im- 745  
age registration in shared-memory multiprocessor envi- 746  
ronments with application to brains, breasts, and bees. 747

748 *IEEE Trans. Inf. Technol. Biomed.*, 7(1):16–25, March  
749 2003.

750 [63] Thomas A Pologruto, Bernardo L Sabatini, and Karel  
751 Svoboda. ScanImage: flexible software for operating  
752 laser scanning microscopes. *Biomed. Eng. Online*, 2:13,  
753 May 2003.

## 754 **Materials and Methods**

### 755 ***Drosophila* stocks, driver line generation, and** 756 **husbandry**

757 The following stocks were used: Canton S (UC San Diego  
758 *Drosophila* Stock Center, CA); Ir8a1 ; Ir25a2 ; Orco1 , Gr63a1  
759 (a kind gift from R. Benton); w; Or56a-GAL4; + (Bloom-  
760 ington *Drosophila* Stock Center, Indiana); w; Or56a-/-; +  
761 (a kind gift from Christopher Potter) (8); w; MB247-GAL4;  
762 + (Bloomington *Drosophila* Stock Center, Indiana); w;  
763 UAS-Kir2.1::GFP;+ (a kind gift from Matthias Landgraf);  
764 w; +; R85E04, Bloomington *Drosophila* Stock Center, In-  
765 diania) (5); w; UAS-TNT-active form; w; UAS-TNT-inactive  
766 form (both kind gifts from C.O’Kane) (7); 20XUAS-IVS-  
767 ChrimsonR::mVenus (attP18);+;+ (48); w; UAS-GCaMP3.0  
768 (attP18); UAS-GCaMP3.0 (attP40); w; UAS-mCD8::GFP;  
769 UAS-mCD8::GFP; +; y, w; poxnMB00113; + (Bloomington  
770 *Drosophila* Stock Center, Indiana); *teashirt*-GAL80 (49); Zp-  
771 GAL4DBD, pJFRC200-10XUASIVS-myr::smGFP-HA (attP18);  
772 +; +; p65ADZp(su(Hw) attP8); +; +; w;p65ADZp(su(Hw)  
773 attP40); +; w; +; p65ADZp(su(Hw) VK00027); pJFRC51-  
774 3xUAS-Syt::smGFP-HA ((Hw) attP1); pJFRC225-5xUAS-IVS-  
775 myr::smGFP-FLAG (VK00005).

776 The LH Split-GAL4 (50) lines for the optogenetic screen  
777 were made as a part of a larger collaborative screen for cre-  
778 ating a cell-type specific driver line library for LHNs (de-  
779 tails described in (36)), using a subset of the enhancer frag-  
780 ments used in generating the original GMR GAL4 lines (5).  
781 The Split-GAL4 lines for the DNns were made essentially sim-  
782 ilarly to (51). Based on our screening of GAL4 and GAL4 with  
783 *teashirt* lines, we selected AD/DBD combinations from the  
784 Janelia (52) and VT (53) collections that we thought shared  
785 expression in individual DNns. To visualize combined expres-  
786 sion patterns, we crossed males carrying a GFP reporter  
787 (pJFRC200-10XUASIVS-myr::smGFP-HA in attP18) and the  
788 ZpGAL4DBD transgene (in attP2) with virgin females carry-  
789 ing the p65ADZp transgene in either su(Hw)attP8, attP40, or  
790 VK00027 and examined expression in 3- to 10-day-old fe-  
791 male progeny. The split-GAL4 combinations that we deemed  
792 sparse enough to include in our DN collection were made  
793 into stable stocks containing the AD and DBD transgenes.  
794 To obtain polarity and higher resolution (40x, 63x) infor-  
795 mation on selected lines, split-GAL4 lines were crossed to  
796 pJFRC51-3xUAS-Syt::smGFP-HA in su(Hw)attP1; pJFRC225-  
797 5xUAS-IVS-myr::smGFP-FLAG in VK00005 and processed  
798 for imaging. We used the multicolor flip out technique to  
799 stochastically label individual neurons in lines that con-  
800 tained multiple cells (54). These protocols are available  
801 on the Janelia FlyLight website ([https://www.janelia.org/  
802 project-team/flylight/protocols](https://www.janelia.org/project-team/flylight/protocols)). Some split-GAL4 lines were  
803 also crossed to 20XUAS-CsChrimson-mVenus trafficked in

attP18 (virginator stock) and processed as above to visual- 804  
ize expression pattern when using the CsChrimson effector, 805  
as observed expression patterns are known to vary slightly 806  
depending on the reporter used (55). Based on their GFP or 807  
CsChrimson expression patterns, we made our best estimate 808  
of the number of background (non-targeted-DN) cell types in 809  
each split-GAL4 line made, and we gave each split line a qual- 810  
ity score of A (no background expression), B (one background 811  
cell type), or C (two or more background cell types). Con- 812  
focal image stacks of the stabilized split-GAL4 intersections 813  
are available online (<http://www.janelia.org/split-gal4>). For 814  
most experiments flies were reared at 25 C and 60% hu- 815  
midity, under a 12:12 hour light-dark cycle, on food made 816  
with the following recipe: 4.8 l H<sub>2</sub>O, 275 g of Glucose, 250 817  
g yeast, 37 g agar, 175 g flour, 125 ml Nipagen solution, 50 818  
ml penicillin/streptomycin, 20 ml propionic acid. The same 819  
food was also used for the egg-laying assays. For optogenetic 820  
behavioural experiments, flies were reared at 22C on stan- 821  
dard Iberian food containing yeast, cornmeal and agar, and 822  
supplemented with 1/500 all-trans retinal (Sigma-Aldrich, St. 823  
Louis, USA). 824

### 825 **Odor stimuli**

826 Geosmin (CAS #16423-19-1) was used at a concentration 826  
of 1:1000 (Sigma-Aldrich, St. Louis, USA , Product Number 827  
UC18). 1-Methylindole (CAS #603-76-9) was used at either 828  
1:1000 or 1:10.000 concentration (Sigma-Aldrich, St. Louis, 829  
USA, Product number 193984). The odors, concentrations, 830  
and odor delivery used for electrophysiology and calcium 831  
imaging were the same as used in (17). 832

### 833 **Egg-laying two-choice assay**

834 Female flies were collected on the day of eclosion under CO<sub>2</sub> 834  
anaesthesia, reared in same sex vials at 25 C and 60% humid- 835  
ity. Female flies aged 5-7 days were then mated with males of 836  
similar age for 6 hours on the day of the experiments. After six 837  
hours of mating the female flies were again isolated from the 838  
males under CO<sub>2</sub> anaesthesia and were left to recover for 2 839  
hours before starting the experiments. For the experiments, 840  
approximately 20 females were transferred without anaes- 841  
thesia into a BugDorm insect rearing cage (24.5x24.5x24.5 842  
cm) (MegaView Science Co., Ltd., TAIWAN) made of polyester 843  
netting. Two ø 50mm Petri dish plates containing Iberian fly 844  
food were placed in opposing corners of the cage and a small 845  
plastic cup cut from the cap of a 1.5 ml Eppendorf tube con- 846  
taining the experimental odour, or the solvent control, was 847  
placed at the center of each food plate. For the geosmin ex- 848  
periments 5 µl of geosmin (1:1000 dilution in mineral oil) 849  
was used as a stimulus. For the experiments done with yeast 850  
odour, 100 µl of 400 mg/ml of baker’s yeast in Milli-Q H<sub>2</sub>O 851  
was used. A nylon mesh was used to physically separate the 852  
flies from the odorant. All experiments started at 12:00 h 853  
Zeitgeber time (+/- 1 h) and lasted for 16 hours (+/- 1 h). 854  
Eggs were counted under a stereo microscope. An oviposition 855  
Preference Index (PI), was calculated by using the formula 856

$$PI = (\text{Eggs on odour plate} - \text{Eggs on control plate}) / \text{Total eggs} \quad (1)$$

|     |                                                                                                |                                                                   |     |
|-----|------------------------------------------------------------------------------------------------|-------------------------------------------------------------------|-----|
| 857 | PI could thus get values from -1 to +1, signifying total                                       | a circular arena of 10 cm diameter, and 3 mm height. Flies        | 911 |
| 858 | avoidance and total preference of the geosmin plate, respec-                                   | were transferred onto the arena without anaesthesia by us-        | 912 |
| 859 | tively.                                                                                        | ing a vacuum pump. All experiments took place in darkness,        | 913 |
| 860 | We also developed an alternative version of the egg-laying                                     | at 25 C and 50% humidity. To prevent the infrared backlight       | 914 |
| 861 | assay (adapted from (31) and used in Figure S3D, E and F, Fig-                                 | from affecting the temperature in the arena, the arena was        | 915 |
| 862 | ure 3K, and Figure 4E). For this we used a single ø 50mm Petri                                 | mounted on a heat sink, and an airflow of 150 ml/min from         | 916 |
| 863 | dish plate containing Iberian fly food. The plate was split in                                 | the four corners of the arena to the centre was maintained.       | 917 |
| 864 | two by a divider, the food was then melted by briefly heat-                                    | A 617 nm wavelength LED (Red-Orange LUXEON Rebel                  | 918 |
| 865 | ing the plates, and the experimental odour (50 µl of 1:1000                                    | LED; Luxeon Star LEDs, Brantford, Ontario, Canada) was            | 919 |
| 866 | geosmin in Milli-Q H <sub>2</sub> O) and solvent control were mixed di-                        | used for the optical stimulation. The behaviour of the flies      | 920 |
| 867 | rectly into the food. After the food had solidified again, the di-                             | was recorded by using a camera (ROHS 1.3 MP B&W Flea3,            | 921 |
| 868 | vider was removed. Five mated females were aspirated onto                                      | US 3.0 Camera; Point Grey, Richmond, BC, Canada) equipped         | 922 |
| 869 | the plates and the Petri dish plate was placed back on top                                     | with a long-pass (800 nm) filter (B&W filter; Schneider Op-       | 923 |
| 870 | of the plates. Experimental duration and other parameters                                      | tics) set to capture at 30 Hz, and controlled via a custom        | 924 |
| 871 | were as above. The main benefit of this version of the assay                                   | script written in Matlab. Only water was used for cleaning the    | 925 |
| 872 | was that the PI variance was lower, which allowed us to use i)                                 | arena.                                                            | 926 |
| 873 | lower sample sizes and, ii) fewer flies per replicate, thus lead-                              | <b>FlyPEZ assay</b>                                               | 927 |
| 874 | ing to a significantly improved experimental throughput. We                                    | The FlyPEZ assay was carried out as described in (41).            | 928 |
| 875 | ascertained that the behavioral phenotype was still solely due                                 | <b>Neuronal reconstructions in EM</b>                             | 929 |
| 876 | to olfaction (Figure S3D), and replicated the main results we                                  | Two EM datasets were used: a full female adult <i>Drosophila</i>  | 930 |
| 877 | obtained with the other assay (Figure S3E). PI was calculated                                  | brain (FAFB) (11), and another partial adult female brain         | 931 |
| 878 | as                                                                                             | (hemibrain) (12). In FAFB, neuron skeletons were manu-            | 932 |
|     | $PI = (\text{Eggs on odour side} - \text{Eggs on control side}) / \text{Total eggs} \quad (2)$ | ally traced using CATMAID (56, 57), following the proce-          | 933 |
| 879 | For the 1-methylindole experiments, we tried both 1:1000                                       | cedure as described in (11). The identification of antennal lobe  | 934 |
| 880 | and 1:10.000 concentrations. As a two-way ANOVA with                                           | glomeruli and their cognate PNs follows (14). PNs were traced     | 935 |
| 881 | genotype and concentration as factors showed a significant                                     | to completion in the LH, and all their presynapses and post-      | 936 |
| 882 | main effect for genotype, but not concentration, and there                                     | synapses were annotated. In the hemibrain, initial neuronal       | 937 |
| 883 | was no observable genotype x concentration interaction, we                                     | morphologies were generated by machine learning meth-             | 938 |
| 884 | pooled both concentration groups for Figure 3K, with ~ half                                    | ods and then proofread by human experts. This process re-         | 939 |
| 885 | of the flies for each genotype coming from each stimulus                                       | solved any mistakes and merged additional processes, al-          | 940 |
| 886 | concentration.                                                                                 | though neurons were not finished to completion. The av-           | 941 |
|     | <b>Egg-laying no-choice assay</b>                                                              | erage neuron completion rate in the LH, as measured by            | 942 |
| 887 | Fly collection, rearing and mating was performed similarly to                                  | the percentage of postsynaptic densities that belong to mor-      | 943 |
| 888 | the two-choice assay. For the no-choice assay, 5 females were                                  | phologies of a significant size, is only 19%. The identification  | 944 |
| 889 | aspirated without anaesthesia onto ø 50 mm Petri dish plates                                   | of synapses was an entirely automatic process (12) that dif-      | 945 |
| 890 | containing fly food, and the lid was placed on the plate. In                                   | fers from the synapse annotation process in CATMAID. For          | 946 |
| 891 | the experiments where the effect of odorants on egg-laying                                     | the reasons above, comparing connectivity between FAFB            | 947 |
| 892 | quantity was tested, the stimuli were pipetted onto a small                                    | the hemibrain as to be done with care. The identification of      | 948 |
| 893 | plastic cup cut from the cap of a 1.5 ml Eppendorf tube. 50 µl                                 | PNs and LHAV1a1 neurons is as described in Scheffer <i>et al.</i> | 949 |
| 894 | of geosmin was used as a stimulus. A nylon mesh was used                                       | (12). The neuron morphologies and connectivity used are           | 950 |
| 895 | for physically separating the flies from the odorant. All exper-                               | released in <a href="#">neuPrintExplorer version 1.1</a>          | 951 |
| 896 | iments started at 12:00 h Zeitgeber time (+/- 1 h) and lasted                                  | <b>DA2 PN downstream sampling in FAFB</b>                         | 952 |
| 897 | for 16 hours (+/- 1 h). Eggs were counted under a stereo mi-                                   | DA2 PN synapses were identified, and all postsynaptic nodes       | 953 |
| 898 | croscope.                                                                                      | were annotated (consistent with the criteria described in         | 954 |
| 899 | <b>Optogenetic four-field assay</b>                                                            | (11)). Once completed, the full set of postsynaptic nodes for     | 955 |
| 900 | The four-field optogenetic assay was carried out essentially                                   | a single representative DA2 PN was randomised. Each post-         | 956 |
| 901 | as described in (37). Crosses were made on normal fly food                                     | synaptic node was then used as a starting point for tracing       | 957 |
| 902 | containing 1:500 all-trans retinal (Sigma-Aldrich, MO, USA),                                   | out a downstream partner. This sampling procedure was con-        | 958 |
| 903 | and eclosed females of the right genotype were collected into                                  | tinued until all postsynaptic nodes were either connected to      | 959 |
| 904 | same-sex vials under cold anaesthesia, and reared in the dark                                  | identifiable neurons, or excluded from further analysis due       | 960 |
| 905 | on 1:250 all-trans retinal food, at 22 C and 50% humidity.                                     | to not being able to connect it to a neuronal backbone (de-       | 961 |
| 906 | Approximately 20 female flies, aged 3-7 days were used for                                     | defined by the presence of visible microtubules) as a result of   | 962 |
| 907 | each experiment. The females were not specifically mated                                       | ambiguous features or missing EM sections. Overall, 74.11%        | 963 |
| 908 | for the experiments, but they were producing fertilised eggs                                   | of postsynaptic nodes were connected to an identifiable neu-      | 964 |
| 909 | by the time of the experiments. The assay was performed on                                     | ron.                                                              | 965 |
| 910 |                                                                                                |                                                                   |     |

966 Partner neurons were initially traced just enough to iden-  
967 tify a soma, thus confirming whether the starting node be-  
968 longed to a new or previously traced neuron. A sample of  
969 15 LHNs of particular interest (the set in [Figure 2](#)) were then  
970 traced ‘to completion’; all identifiable branches of the neuron  
971 were fully traced, and all incoming and outgoing synapses  
972 annotated (note: the neuropeptidergic brain-spanning neu-  
973 ron AVLP594 was only fully traced in the LH). With tracing  
974 completed, we were able to examine these neurons’ complete  
975 morphology (manually identifying the primary neurite, den-  
976 drites, and axon for each), as well as their PN inputs within  
977 the LH.

978 This basic sampling procedure was repeated for the axons  
979 of selected third order neurons (LHAV1a1#1 and PV6a3#1).  
980 However, the process was not continued to completion for  
981 these neurons ([Figure S4A](#) and D).

## 982 Potential DA2 axo-axonic connectivity in FAFB

983 To assess whether or not the DA2-DL4 connectivity was spe-  
984 cific, we checked which PN skeletons pass within 1µm of a  
985 DA2 output synapse in the LH (in the right LH, approximately  
986 86% of PN-PN axo-axonic synapses occur within this thresh-  
987 old—data not shown). Each instance where a PN skeleton  
988 was within this 1µm radius was counted as a single poten-  
989 tial synapse. This potential connectivity was then compared  
990 to the observed DA2 PNs axo-axonic connectivity.

## 991 Clustering of FAFB neuron morphologies

992 Neurons downstream of the completed DA2 PN were first  
993 divided into four broad groups: LHONs, LHLNs, PNs, and  
994 others. PNs were excluded from further analysis, and each  
995 broad group of neurons analysed separately. The `nat.nblast`  
996 package (<https://github.com/natverse/nat.nblast>) was used  
997 for both NBLASTing (16, 58, 59) and hierarchical clustering  
998 of the neurons. More specifically, within the broad groups,  
999 each neuron was split into a primary neurite (approximated  
1000 by taking the longest unbranching segment of the neuron),  
1001 and the rest (the complement of the primary neurite approx-  
1002 imation). Both parts of each neuron were then converted to  
1003 dot properties representations (16, 58). The NBLAST algo-  
1004 rithm (16, 58) was used to generate two all by all similarity  
1005 matrices; one for the primary neurites, and one for the rest of  
1006 the neurons. The obtained matrices were then combined by  
1007 taking the weighted element-wise mean of both matrices, so  
1008 that the primary neurite was assigned a weight of 0.8 and the  
1009 rest of the neuron a weight of 0.2. This was done to i) more  
1010 closely match the manual annotation system of LHNs (that  
1011 uses the primary neurite tract as the first distinguishing fea-  
1012 ture in a tri-level hierarchical scheme) (17), and ii) deal with  
1013 the incompleteness of a large proportion of the neurons. The  
1014 NBLAST similarity matrices were then converted to distance  
1015 matrices, and hierarchical clustering was performed by us-  
1016 ing the average linkage method. Cut heights were determined  
1017 separately for each broad group (LHON, LHLN, other) after  
1018 manually assessing the cluster groups.

## Neuron and neuropil nomenclature

1019

Annotation of neuronal types was based on Bates *et al.* (14) 1020  
and Scheffer *et al.* (12) (for LHNs) and Namiki *et al.* (51) (for 1021  
DNs). For the cases in which there is more than one individ- 1022  
ual per type, each individual has been given a unique name 1023  
by adding ‘#<number>’ after the type name. Image data for 1024  
light level type example skeletons from FlyCircuit for pre- 1025  
viously described types (15) can be browsed by searching 1026  
for the neuron identifier at <http://www.virtualflybrain.org/>. 1027  
Neuropil nomenclature was based on (18) for the brain, and 1028  
(60) for the VNC. 1029

## In silico anatomy screen

1030

A confocal stack of an R85E04 brain was registered onto a 1031  
JFRC2 template brain (5), and the axonal arbors of the DA2 1032  
PNs were converted into a binary mask with the Segmenta- 1033  
tion Editor tool in the Fiji software (NIH, Bethesda, USA). The 1034  
mask was then used as an ROI to look for driver lines with 1035  
expression overlapping with the DA2 axons in the LH. This 1036  
was done by overlaying Janelia FlyLight GAL4 lines (5) with 1037  
expression in the LH with the mask and visually assessing the 1038  
overlap. Each line was scored for goodness of overlap, and the 1039  
neurons in the best lines were identified (17), and then cross- 1040  
identified in the LH Split-GAL4 lines (36), where possible. 1041

## Confocal microscopy

1042

A Zeiss 710 confocal microscope was used for image acqui- 1043  
sition. Brains were imaged at 768 x 768, or 2048x1024 (AL 1044  
closeup), pixel resolution in 1 µm slices (voxel size: (0.46 x 1045  
0.46 x 1 µm) using an EC Plan-Neofluar 40x/1.30 oil immer- 1046  
sion objective (Carl Zeiss AG, Jena, Germany) and 0.6 zoom 1047  
factor. All images were acquired at 16 bit colour depth. 1048

## Image registration

1049

Image registration for the confocal data was carried out 1050  
according to (61). In brief: the presynaptic marker Bruch- 1051  
pilot (labeled by `nc82`) was used as a basis for performing 1052  
an intensity-based non-rigid warping registration (62) 1053  
onto a template brain (JFRC2 or JFRC2013, available here: 1054  
<https://github.com/jefferislab/BridgingRegistrations>). 1055  
The registration procedure itself was performed by using 1056  
the cross platform Computational Morphometry Toolkit 1057  
software (<http://www.nitrc.org/projects/cmtk>). Bridging 1058  
registrations were used for transforming neurons from one 1059  
template brain to another (11, 59) by using the `nat.flybrains` 1060  
(<https://github.com/natverse/nat.flybrains>) and `elmr` 1061  
(<https://github.com/natverse/elmr>) R packages. A similar 1062  
template was derived from the `nc82` expression pattern 1063  
in the VNC of an example female Canton S fly imaged by 1064  
the FlyLight Project team (template available here: [https://github.com/VirtualFlyBrain/DrosAdultVNSdomains/](https://github.com/VirtualFlyBrain/DrosAdultVNSdomains/blob/master/template/Neuropil_185.nrrd) 1065  
[blob/master/template/Neuropil\\_185.nrrd](https://github.com/VirtualFlyBrain/DrosAdultVNSdomains/blob/master/template/Neuropil_185.nrrd)). Our VNC align- 1066  
ment pipeline was adapted from (60). Briefly: confocal 1067  
VNC stacks were first converted to an 8-bit `nrrd` file format, 1068  
preprocessed using the `nc82` reference channel to normalize 1069  
contrast across samples, rotated to approximately orient the 1070  
VNC along the anterior-posterior axis, and then the channels 1071  
1072

1073 were aligned to the template by nonrigid warping (62) using  
1074 the Computational Morphometry Toolkit.

## 1075 Image processing for DN lines

1076 Neuron tracing was carried out semi-manually using Amira  
1077 5.4.3 (Visage Imaging, Fuerth, Germany). Volume rendering  
1078 was performed using Amira 'generate surface' function. We  
1079 first detected the signal with the Amira 'Interactive Thresh-  
1080 olding' function. We then corrected any false detection by  
1081 manual tracing. Using this image as a mask, we obtained the  
1082 final masked images shown in the figures using a custom-  
1083 made program written in MATLAB and the image process-  
1084 ing toolbox (MathWorks, Natick, MA, USA). The contrast and  
1085 brightness of images were modified in Image J (National In-  
1086 stitutes of Health, Bethesda, MD). Confocal image stacks of  
1087 split-GAL4 expression patterns in the brain were aligned to  
1088 standardized brain template JFRC2013 (see above).

## 1089 Light versus EM comparisons of neuron mor- 1090 phology

1091 All neurons taking the AV1 tract in EM were traced far  
1092 enough to identify major branches and overall morphology.  
1093 The light-level tracing of LHAV1a1 was obtained by semi-  
1094 automated tracing in Amira (Thermo Fisher Scientific) from  
1095 LH1983. Both light and EM neurons were converted to the  
1096 FCWB reference space via [nat.flybrains](https://github.com/natverse/nat.flybrains) (<https://github.com/natverse/nat.flybrains>) (59), and [elmr](https://github.com/natverse/elmr) (<https://github.com/natverse/elmr>) packages for R, and then to dot properties  
1098 representations by the [nat.nblast](https://github.com/natverse/nat.nblast) package (<https://github.com/natverse/nat.nblast>) (16, 58). The primary neurite tract  
1101 was then manually removed from the neurons (by drawing an  
1102 ROI), and the light-level tracing was compared to all the EM  
1103 tracings from the AV1 tract by using the NBLAST algorithm  
1104 (16, 58).

## 1105 Immunohistochemistry

1106 Immunohistochemistry with antibodies was done similarly  
1107 to (10), and the chemical labeling similarly to (6), with the ex-  
1108 ception of an overnight blocking step being used for antibody  
1109 stainings. Primary antibodies used were: 1:20 mouse anti-  
1110 nc82 (DSHB, University of Iowa, USA), 1:1600 chicken anti-  
1111 GFP (ab13970, Abcam, Cambridge, UK), 1:200 rabbit anti-  
1112 GABA (A2052, Sigma-Aldrich, MO, USA), and 1:400 mouse  
1113 anti-ChAT (4B1, DSHB, University of Iowa, USA). Secondary  
1114 antibodies were: Alexa-488 Goat anti-chicken, Alexa-568  
1115 Goat anti-Rabbit, Goat anti-mouse 633, all 1:800 (Life Tech-  
1116 nologies, Carlsbad, CA). For the chemical labeling, 1:1000  
1117 concentrations of SNAP-Surface 488 (NEB #S9124, New Eng-  
1118 land Biolabs, Ipswich, MA), TMR Halo (G8252, Promega,  
1119 Madison, WI) were used. Finally, brains were mounted on  
1120 charged slides (Menzel-Glaeser, Braunschweig, Germany)  
1121 using Vectashield (Vector Laboratories) as the mounting  
1122 medium.

## 1123 Electrophysiology

1124 *In vivo* patch-clamp recordings from the DA2 projection neu-  
1125 rons were carried out as described in (17) using the R85E04

driver line and mCD8::GFP to label the neurons. Analysis  
of recordings used the open source gphys R (CRAN, <http://www.r-project.org>) package (see <http://jefferis.github.io/gphys>). 1126  
1127  
1128  
1129

## *In vivo* calcium imaging 1130

Functional imaging experiments on LHAV1a1 neurons were  
performed on flies containing two copies of UAS-GCaMP3  
(at attP18 and attP40) driven by LH728 Split-GAL4 driver.  
GCaMP3 was used instead of newer versions of GCaMP for its  
higher baseline fluorescence which allowed easier identifica-  
tion of the neurons. Flies were placed into custom built hold-  
ers, leaving the head and thorax exposed, under CO2 anaes-  
thesia and secured in place with UV curable glue (Kemxert,  
KOA 300). Wax was used for securing the legs and the pro-  
boscis. A window was then cut into the head capsule with  
sharp forceps, and trachea and air sacks were removed in  
order to uncover the brain. Fly brains were bathed in exter-  
nal saline ([94]) adjusted to 275mM and 7.3 pH, and bub-  
bled with 5% CO2. The saline had the following composi-  
tion (Concentration, mM): NaCl 104.75; KCl 5; NaH2PO4 1;  
MgCl2.6H2O 1; CaCl2.2H2O 1; NaHCO3 26; TES 5; glucose  
10; trehalose 10. The antennae were left under the holder  
so that they could be exposed to odour stimuli. A custom-  
built setup based on the Sutter (Novato, CA) Movable Ob-  
jective Microscope with a Zeiss W Plan-Apochromat 20x/1.0  
objective was used for the two photon imaging. A Coherent  
(Santa Clara, CA) Chameleon Vision Ti-Sapphire provided ex-  
citation, and image acquisition was controlled by ScanIm-  
age software (63). Image acquisition and odour delivery were  
triggered by a separate PC via Igor Pro software (Wavemet-  
rics, Lake Oswego, OR) running Neuromatic. Images were  
captured at 8Hz at 265x255 pixel, and two photon excitation  
was provided at 900 nm. Odour stimulation was performed  
largely similarly to (24). Odour delivery started at 3000 ms  
after the beginning of a trial and lasted for 2000 ms. Im-  
age analysis was performed with custom scripts written in  
R employing the open source [scanimage](https://github.com/jefferis/scanimage) package (see <https://github.com/jefferis/scanimage>, 10.5281/zenodo.1401028).  
Data was both manually checked for motion artifacts, and ex-  
cluded from the analysis if there were larger than 5% dF/F  
peaks during the baseline recording epoch, or if there were  
not larger than 5% dF/F responses to any of the tested odours  
during the stimulation epoch. 1131  
1132  
1133  
1134  
1135  
1136  
1137  
1138  
1139  
1140  
1141  
1142  
1143  
1144  
1145  
1146  
1147  
1148  
1149  
1150  
1151  
1152  
1153  
1154  
1155  
1156  
1157  
1158  
1159  
1160  
1161  
1162  
1163  
1164  
1165  
1166  
1167  
1168

## Statistical analysis 1169

All statistical analysis was performed in R (<https://cran.r-project.org/>). Shapiro-Wilk or Kolmogorov-Smirnov tests  
were used for assessing normality of distributions. Normally  
distributed data was then analysed by using One or Two-  
way ANOVAs, Welch's one or two-sample t-tests, or Paired  
samples t-tests, whereas non-normally distributed data with  
Kruskal-Wallis rank sum tests, Wilcoxon rank sum tests,  
and Wilcoxon signed rank tests, where appropriate (see also  
Supplementary Table 1). For the egg-laying two-choice be-  
havioural experiments (with R85E04 and LH728), power test-  
ing was done with effect size estimates based on data ob-  
tained on preliminary data on wild type and anosmic mu-  
tants (Ir8a1; Ir25a2; Orco1, Gr63a1) (values used for power 1170  
1171  
1172  
1173  
1174  
1175  
1176  
1177  
1178  
1179  
1180  
1181  
1182

1183 test estimates were wild type mean  $PI = -.45$ ,  $SD = .6$ ; anos-  
1184 mic mean  $PI = 0$ ,  $SD = .6$ , which gives an effect size estimate  
1185 of Cohen's  $d = 0.75$ ), and based on this the required sample  
1186 size for the experiments was 38.66, taking into account the  
1187 Bonferroni corrected significance values. The power size es-  
1188 timations were done with the R package `pwr` ([https://cran.](https://cran.r-project.org/web/packages/pwr/)  
1189 [r-project.org/web/packages/pwr/](https://cran.r-project.org/web/packages/pwr/)).

1190 The randomization tests for comparing DA2 downstream  
1191 target morphology (see also 'Clustering of neuron morphol-  
1192 ogy' below) to the number of DA2 inputs (Figure S2F) was  
1193 conducted with custom R scripts. First, the coefficient of vari-  
1194 ation (CV) of DA2 inputs for each morphological cluster was  
1195 calculated as

$$CV = \frac{\text{SD of DA2 inputs for cluster}}{\text{Mean of DA2 inputs for cluster}} \quad (3)$$

1196 The DA2 input numbers were then randomly reassigned  
1197 to clusters repeatedly ( $n = 10,000$ ), and new CVs were calcu-  
1198 lated for each iteration. Finally, the weighted mean (weighted  
1199 by the proportion of neurons belonging to the cluster) of  
1200 the original CVs were compared to the distribution of mean  
1201 CV values obtained by the reshuffling. This was not done  
1202 on 'other' neurons as only a few morphological clusters had  
1203 multiple neurons in them, which makes it impossible to as-  
1204 sess the variability of a cluster.

1205 The randomization tests for aversion index (AI) values  
1206 of completed LHNs were conducted with custom R scripts.  
1207 First, the connectivity matrix of all excitatory uPNs (with  
1208 known valence) was obtained via the R package `catmaid`  
1209 (<https://github.com/natverse/rcatmaid>). In the cases of mul-  
1210 tiple sister PNs innervating the same glomerulus, the PNs  
1211 were collapsed together into a PN type by taking the sum  
1212 of their connections. All PN types were then assigned a va-  
1213 lence ("aversive" or "not aversive") based on earlier litera-  
1214 ture. After removing PNs of unknown valence, AI values for  
1215 the LHNs were calculated as the ratio of the sum of connec-  
1216 tions from aversive PNs and the total sum of connections  
1217 from excitatory uPNs. For the randomisation tests, DA2 PNs  
1218 were excluded from the sample to avoid bias, and new (non-  
1219 DA2) AI values were calculated. The valence labels were then  
1220 randomly reshuffled ( $n = 1000$ ) and the AI values recalculated.  
1221 The number of aversive and not aversive PN types was held  
1222 constant, and the same as for the original data throughout.  
1223 For each LHN, the observed distribution of random AI values  
1224 was then compared to the original value, and the neuron was  
1225 considered to significantly integrate aversive input if the ob-  
1226 served AI value was higher than 95% of the values obtained  
1227 by reshuffling.

1228 Behavioural and imaging data throughout the paper are  
1229 presented as notched box plots. The box represents the in-  
1230 terquartile range of the sample (IQR, 25th - 75th percentiles)  
1231 and is split by the median line. The whiskers extend to 1.5 x  
1232 IQR beyond the box and the notches represent the 95% con-  
1233 fidence interval for the sample median. The points mark in-  
1234 dividual sample points and asymmetrical notches indicate  
1235 skewed distributions.

## 1236 Data availability

1237 The FAFB reconstructed neurons will be shared with the Vir-  
1238 tual Fly Brain project upon publication and will be available

from (<https://fafb.catmaid.virtualflybrain.org/>) . In addition, 1239  
we are providing the skeletons as SWC files and a connectiv- 1240  
ity matrix as supplementary files. 1241
